# Supplementary material for: Mitochondria-targeting monofunctional platinum(ii)–lonidamine conjugates for cancer cell de-energization
Source: Royal Society of Chemistry journal article supplement (doi:10.1039/d0qi01028f), 2020-01-01
Supplement: d0qi01028f3.xlsx [file d0qi01028f3.xlsx]

## Sheet: Table S3
Gene	Reference_Species	Ref_Gene	Family	Ref_Gene_Protein_have_DBD	PM11_count	PM21_count	PM32_count	baseMean	CN11_count	CN12_count	CN13_count	FoldChange	Log2FoldChange	pval	padj	Up/Down	Significant
ENSG00000167723	Homo_sapiens	ENSG00000149948	HMGI/HMGY	ENSP00000437621;ENSP00000437747;ENSP00000443372;ENSP00000407306;ENSP00000439317;ENSP00000377206;ENSP00000346658;ENSP00000440919;ENSP00000384026;ENSP00000377205;	13	12	17	7.71965	0	0	1	46.1265	5.52752	3.26298e-05	0.000133142	up	yes
ENSG00000137491	Pongo_abelii	ENSPPYG00000004736	HMGI/HMGY	ENSPPYP00000005395;ENSPPYP00000005394;	23	23	17	11.8404	3	0	0	24.1199	4.59215	2.16481e-06	1.01816e-05	up	yes
ENSG00000197405	Pan_troglodytes	ENSPTRG00000005184	HMGI/HMGY	ENSPTRP00000051717;	59	55	48	30.3319	3	4	1	23.805	4.57319	1.71346e-14	1.54725e-13	up	yes
ENSG00000176046	Pan_troglodytes	ENSPTRG00000005184	HMGI/HMGY	ENSPTRP00000051717;	192	164	166	98.1973	7	14	9	20.6501	4.36808	2.18902e-43	5.48336e-42	up	yes
ENSG00000174343	Takifugu_rubripes	ENSTRUG00000008738	Homeobox	ENSTRUP00000021947;	10	3	4	3.11446	0	0	1	18.2715	4.19152	0.00654471	0.0181501	up	yes
ENSG00000274290	Pan_troglodytes	ENSPTRG00000010773	zf-C2H2	ENSPTRP00000058362;	10	2	4	2.99745	1	0	0	17.1702	4.10183	0.00885818	0.023826	up	yes
ENSG00000243742	Nomascus_leucogenys	ENSNLEG00000003169	HMGI/HMGY	ENSNLEP00000003825;ENSNLEP00000003824;	141	125	146	78.3213	5	4	21	16.7062	4.06231	3.23855e-32	6.18466e-31	up	yes
ENSG00000236501	Pongo_abelii	ENSPPYG00000008158	Homeobox	ENSPPYP00000009170;	7	1	7	2.87993	1	0	0	16.372	4.03316	0.0114003	0.0299333	up	yes
ENSG00000155980	Tetraodon_nigroviridis	ENSTNIG00000005314	ZBTB	ENSTNIP00000021352;ENSTNIP00000007996;	6	3	5	2.6577	0	1	0	15.2504	3.93077	0.0125739	0.0327251	up	yes
ENSG00000182264	Nomascus_leucogenys	ENSNLEG00000003169	HMGI/HMGY	ENSNLEP00000003825;ENSNLEP00000003824;	47	26	38	21.4603	3	6	1	12.9446	3.69428	8.57881e-10	5.59203e-09	up	yes
ENSG00000139269	Homo_sapiens	ENSG00000149948	HMGI/HMGY	ENSP00000437621;ENSP00000437747;ENSP00000443372;ENSP00000407306;ENSP00000439317;ENSP00000377206;ENSP00000346658;ENSP00000440919;ENSP00000384026;ENSP00000377205;	162	159	153	91.828	11	12	22	12.6179	3.6574	6.58633e-39	1.4893e-37	up	yes
ENSG00000132837	Pan_troglodytes	ENSPTRG00000005184	HMGI/HMGY	ENSPTRP00000051717;	33	21	19	13.9345	0	3	4	12.5955	3.65484	4.79779e-07	2.41744e-06	up	yes
ENSG00000165495	Pan_troglodytes	ENSPTRG00000004440	Homeobox	ENSPTRP00000007586;	23	12	16	9.74246	0	1	4	12.5036	3.64428	2.74572e-05	0.000113414	up	yes
ENSG00000130513	Homo_sapiens	ENSG00000167562	zf-C2H2	ENSP00000301093;ENSP00000375662;ENSP00000444339;	4342	4454	4129	2514.71	360	398	504	12.1876	3.60734	0	0	up	yes
ENSG00000152463	Pongo_abelii	ENSPPYG00000004736	HMGI/HMGY	ENSPPYP00000005395;ENSPPYP00000005394;	56	53	41	28.9808	2	1	13	11.5235	3.52651	5.67375e-12	4.37566e-11	up	yes
ENSG00000134321	Nomascus_leucogenys	ENSNLEG00000003169	HMGI/HMGY	ENSNLEP00000003825;ENSNLEP00000003824;	73	73	61	40.5416	8	6	8	11.1188	3.47492	1.35528e-17	1.43867e-16	up	yes
ENSG00000236404	Nomascus_leucogenys	ENSNLEG00000003169	HMGI/HMGY	ENSNLEP00000003825;ENSNLEP00000003824;	163	161	157	94.4266	15	14	24	10.838	3.43802	2.11105e-38	4.71818e-37	up	yes
ENSG00000144619	Gorilla_gorilla	ENSGGOG00000015116	zf-C2H2	ENSGGOP00000014752;	17	26	20	12.5515	3	4	0	10.4144	3.38051	5.29413e-06	2.38359e-05	up	yes
ENSG00000241322	Caenorhabditis_elegans	WBGene00012757	zf-LITAF-like	Y41C4A.11;	40	55	30	24.5869	4	2	9	10.0373	3.3273	2.9177e-10	1.97948e-09	up	yes
ENSG00000248323	Pongo_abelii	ENSPPYG00000004736	HMGI/HMGY	ENSPPYP00000005395;ENSPPYP00000005394;	2941	2758	2659	1651.67	252	392	351	9.96997	3.31759	0	0	up	yes
ENSG00000153404	Nomascus_leucogenys	ENSNLEG00000008912	zf-C2H2	ENSNLEP00000010858;	36	34	33	20.3851	2	5	6	9.52637	3.25193	3.08326e-09	1.90487e-08	up	yes
ENSG00000103522	Homo_sapiens	ENSG00000273150	GTF2I	ENSP00000477170;	30	45	26	20.0643	2	6	5	9.31071	3.21889	1.21536e-08	7.13172e-08	up	yes
ENSG00000171931	Caenorhabditis_elegans	WBGene00012757	zf-LITAF-like	Y41C4A.11;	49	29	45	24.373	1	9	6	9.2525	3.20984	7.92856e-10	5.1945e-09	up	yes
ENSG00000151632	Pan_troglodytes	ENSPTRG00000005184	HMGI/HMGY	ENSPTRP00000051717;	465	468	461	279.278	54	59	75	8.82902	3.14225	5.45291e-99	3.50586e-97	up	yes
ENSG00000134548	Nomascus_leucogenys	ENSNLEG00000008912	zf-C2H2	ENSNLEP00000010858;	232	168	177	115.48	16	38	28	8.35734	3.06304	1.04295e-37	2.27047e-36	up	yes
ENSG00000161011	Nomascus_leucogenys	ENSNLEG00000008912	zf-C2H2	ENSNLEP00000010858;	53824	53317	50446	31739	5938	7306	9541	8.27251	3.04832	0	0	up	yes
ENSG00000164220	Nomascus_leucogenys	ENSNLEG00000003169	HMGI/HMGY	ENSNLEP00000003825;ENSNLEP00000003824;	389	332	349	216.856	43	50	73	7.69625	2.94416	9.14472e-73	3.93713e-71	up	yes
ENSG00000233355	Homo_sapiens	ENSG00000273150	GTF2I	ENSP00000477170;	19	14	19	10.5614	1	1	7	7.16561	2.84109	0.000116183	0.000439314	up	yes
ENSG00000274317	Monodelphis_domestica	ENSMODG00000027595	TF_bZIP	ENSMODP00000039524;	7	7	10	5.00197	2	1	1	7.01149	2.80972	0.00686195	0.0189401	up	yes
ENSG00000198074	Nomascus_leucogenys	ENSNLEG00000008912	zf-C2H2	ENSNLEP00000010858;	80	90	76	50.7923	13	9	22	6.69914	2.74398	8.67258e-17	8.82727e-16	up	yes
ENSG00000249328	Pongo_abelii	ENSPPYG00000004736	HMGI/HMGY	ENSPPYP00000005395;ENSPPYP00000005394;	25	20	20	13.4565	2	7	3	6.41024	2.68038	2.03341e-05	8.55035e-05	up	yes
ENSG00000260729	Canis_familiaris	ENSCAFG00000003081	bHLH	ENSCAFP00000004588;ENSCAFP00000004580;	11	9	6	5.30368	0	2	3	6.36569	2.67032	0.00716788	0.0197027	up	yes
ENSG00000127533	Nomascus_leucogenys	ENSNLEG00000003169	HMGI/HMGY	ENSNLEP00000003825;ENSNLEP00000003824;	22	12	14	9.86819	1	5	3	6.34885	2.66649	0.000286814	0.00102598	up	yes
ENSG00000130477	Nomascus_leucogenys	ENSNLEG00000003169	HMGI/HMGY	ENSNLEP00000003825;ENSNLEP00000003824;	31	25	15	14.4891	0	5	9	6.25445	2.64488	2.85387e-05	0.000117518	up	yes
ENSG00000104413	Pan_troglodytes	ENSPTRG00000001856	ARID	ENSPTRP00000003106;	119	104	103	68.1127	20	14	30	6.07058	2.60184	9.47168e-21	1.1666e-19	up	yes
ENSG00000156298	Oryctolagus_cuniculus	ENSOCUG00000015389	TEA	ENSOCUP00000003414;ENSOCUP00000013217;	22	16	13	10.475	0	1	10	5.90472	2.56187	0.000722515	0.00241942	up	yes
ENSG00000108448	Microcebus_murinus	ENSMICG00000001860	zf-MIZ	ENSMICP00000001688;	3434	3321	2992	2048.24	513	651	829	5.83326	2.5443	0	0	up	yes
ENSG00000023171	Homo_sapiens	ENSG00000149948	HMGI/HMGY	ENSP00000437621;ENSP00000437747;ENSP00000443372;ENSP00000407306;ENSP00000439317;ENSP00000377206;ENSP00000346658;ENSP00000440919;ENSP00000384026;ENSP00000377205;	464	475	470	297.827	99	87	99	5.82434	2.5421	3.98766e-71	1.69042e-69	up	yes
ENSG00000272720	Nomascus_leucogenys	ENSNLEG00000008912	zf-C2H2	ENSNLEP00000010858;	31	26	27	17.5469	2	4	12	5.74888	2.52328	4.06384e-06	1.85216e-05	up	yes
ENSG00000101203	Tetraodon_nigroviridis	ENSTNIG00000016985	Homeobox	ENSTNIP00000020108;	70	53	65	39.7685	12	14	13	5.69081	2.50863	2.0773e-12	1.64479e-11	up	yes
ENSG00000130766	Tetraodon_nigroviridis	ENSTNIG00000016985	Homeobox	ENSTNIP00000020108;	1540	1627	1459	977.94	250	312	415	5.66122	2.50111	1.13662e-219	2.33225e-217	up	yes
ENSG00000177614	Danio_rerio	ENSDARG00000039063	THAP	ENSDARP00000057043;	7	8	8	4.86356	1	1	3	5.60786	2.48745	0.0127974	0.0332464	up	yes
ENSG00000135902	Takifugu_rubripes	ENSTRUG00000008738	Homeobox	ENSTRUP00000021947;	18	6	5	6.00391	2	2	2	5.57974	2.4802	0.00799739	0.0217167	up	yes
ENSG00000136010	Pan_troglodytes	ENSPTRG00000005184	HMGI/HMGY	ENSPTRP00000051717;	582	564	514	353.845	103	120	146	5.34711	2.41876	1.29245e-92	7.67036e-91	up	yes
ENSG00000197168	Nomascus_leucogenys	ENSNLEG00000003169	HMGI/HMGY	ENSNLEP00000003825;ENSNLEP00000003824;	9	10	11	6.37389	0	3	4	5.31406	2.40981	0.00628436	0.0175112	up	yes
ENSG00000166750	Homo_sapiens	ENSG00000149948	HMGI/HMGY	ENSP00000437621;ENSP00000437747;ENSP00000443372;ENSP00000407306;ENSP00000439317;ENSP00000377206;ENSP00000346658;ENSP00000440919;ENSP00000384026;ENSP00000377205;	2712	2326	2426	1593.13	435	606	636	5.28865	2.4029	1.91277e-292	6.47255e-290	up	yes
ENSG00000115902	Nomascus_leucogenys	ENSNLEG00000008912	zf-C2H2	ENSNLEP00000010858;	870	945	867	575.829	178	202	232	5.20323	2.37941	9.58132e-125	8.63572e-123	up	yes
ENSG00000151012	Homo_sapiens	ENSG00000149948	HMGI/HMGY	ENSP00000437621;ENSP00000437747;ENSP00000443372;ENSP00000407306;ENSP00000439317;ENSP00000377206;ENSP00000346658;ENSP00000440919;ENSP00000384026;ENSP00000377205;	16073	14424	14403	9619.46	2927	3381	3958	5.17748	2.37225	0	0	up	yes
ENSG00000237596	Pongo_abelii	ENSPPYG00000004736	HMGI/HMGY	ENSPPYP00000005395;ENSPPYP00000005394;	15	14	13	8.92781	1	3	6	5.14948	2.36443	0.00127068	0.00407734	up	yes
ENSG00000078081	Nomascus_leucogenys	ENSNLEG00000008912	zf-C2H2	ENSNLEP00000010858;	222	169	180	122.091	31	51	50	5.14377	2.36283	6.00458e-31	1.09883e-29	up	yes
ENSG00000137809	Homo_sapiens	ENSG00000273150	GTF2I	ENSP00000477170;	14	20	16	10.7207	1	5	6	5.09905	2.35023	0.000509457	0.00175065	up	yes
ENSG00000169302	Gorilla_gorilla	ENSGGOG00000022966	HMGI/HMGY	ENSGGOP00000023432;	194	183	175	118.9	45	26	59	5.04166	2.3339	5.23927e-27	8.44942e-26	up	yes
ENSG00000230606	Pan_troglodytes	ENSPTRG00000011111	zf-C2H2	ENSPTRP00000019074;	10	6	8	5.10364	1	0	5	4.98205	2.31674	0.0199534	0.0490645	up	yes
ENSG00000167995	Homo_sapiens	ENSG00000149948	HMGI/HMGY	ENSP00000437621;ENSP00000437747;ENSP00000443372;ENSP00000407306;ENSP00000439317;ENSP00000377206;ENSP00000346658;ENSP00000440919;ENSP00000384026;ENSP00000377205;	15	13	15	9.36727	3	7	0	4.92642	2.30054	0.00251716	0.00762781	up	yes
ENSG00000147174	Nomascus_leucogenys	ENSNLEG00000003169	HMGI/HMGY	ENSNLEP00000003825;ENSNLEP00000003824;	89	77	78	52.6157	9	24	28	4.83465	2.27341	1.34836e-13	1.15382e-12	up	yes
ENSG00000185250	Homo_sapiens	ENSG00000149948	HMGI/HMGY	ENSP00000437621;ENSP00000437747;ENSP00000443372;ENSP00000407306;ENSP00000439317;ENSP00000377206;ENSP00000346658;ENSP00000440919;ENSP00000384026;ENSP00000377205;	24	27	9	12.8197	3	4	8	4.80888	2.2657	0.000366842	0.00128977	up	yes
ENSG00000261824	Pongo_abelii	ENSPPYG00000004736	HMGI/HMGY	ENSPPYP00000005395;ENSPPYP00000005394;	582	540	510	355.238	123	133	152	4.73369	2.24297	6.3473e-81	3.09941e-79	up	yes
ENSG00000105499	Nomascus_leucogenys	ENSNLEG00000008912	zf-C2H2	ENSNLEP00000010858;	15	5	15	7.61707	2	3	4	4.66618	2.22224	0.00564228	0.0158672	up	yes
ENSG00000260231	Homo_sapiens	ENSG00000149948	HMGI/HMGY	ENSP00000437621;ENSP00000437747;ENSP00000443372;ENSP00000407306;ENSP00000439317;ENSP00000377206;ENSP00000346658;ENSP00000440919;ENSP00000384026;ENSP00000377205;	38	34	28	21.8193	8	11	6	4.66246	2.22109	2.18733e-06	1.0275e-05	up	yes
ENSG00000041515	Ficedula_albicollis	ENSFALG00000008136	RHD	ENSFALP00000008500;ENSFALP00000008504;	105	93	103	65.9657	22	26	30	4.5866	2.19743	1.04908e-16	1.06275e-15	up	yes
ENSG00000167103	Nomascus_leucogenys	ENSNLEG00000003169	HMGI/HMGY	ENSNLEP00000003825;ENSNLEP00000003824;	197	155	157	111.045	37	40	55	4.58175	2.1959	2.02928e-26	3.19516e-25	up	yes
ENSG00000261270	Pan_troglodytes	ENSPTRG00000001856	ARID	ENSPTRP00000003106;	11	8	14	7.20353	1	2	6	4.5561	2.1878	0.00720867	0.0198007	up	yes
ENSG00000234465	Homo_sapiens	ENSG00000273150	GTF2I	ENSP00000477170;	123	125	111	78.6703	20	39	36	4.5135	2.17425	1.03223e-18	1.16092e-17	up	yes
ENSG00000101280	Nomascus_leucogenys	ENSNLEG00000003169	HMGI/HMGY	ENSNLEP00000003825;ENSNLEP00000003824;	113	114	106	73.5959	21	43	26	4.37488	2.12924	1.06973e-15	1.02753e-14	up	yes
ENSG00000186832	Takifugu_rubripes	ENSTRUG00000016703	Homeobox	ENSTRUP00000042740;ENSTRUP00000042741;ENSTRUP00000042742;	16	8	10	7.4798	4	2	3	4.37202	2.1283	0.00696511	0.0192028	up	yes
ENSG00000186952	Callithrix_jacchus	ENSCJAG00000017928	RHD	ENSCJAP00000033111;ENSCJAP00000020309;ENSCJAP00000033112;	13	12	18	9.51872	2	4	6	4.36779	2.1269	0.00219079	0.00672223	up	yes
ENSG00000134955	Homo_sapiens	ENSG00000149948	HMGI/HMGY	ENSP00000437621;ENSP00000437747;ENSP00000443372;ENSP00000407306;ENSP00000439317;ENSP00000377206;ENSP00000346658;ENSP00000440919;ENSP00000384026;ENSP00000377205;	404	391	328	247.337	80	102	124	4.36714	2.12669	2.26921e-53	6.99179e-52	up	yes
ENSG00000131737	Takifugu_rubripes	ENSTRUG00000016703	Homeobox	ENSTRUP00000042740;ENSTRUP00000042741;ENSTRUP00000042742;	64	70	58	42.6254	15	25	12	4.31747	2.11019	1.08766e-09	7.03039e-09	up	yes
ENSG00000108846	Nomascus_leucogenys	ENSNLEG00000003169	HMGI/HMGY	ENSNLEP00000003825;ENSNLEP00000003824;	3116	2685	2459	1833.28	670	780	876	4.19323	2.06806	4.45804e-238	1.02365e-235	up	yes
ENSG00000166046	Nomascus_leucogenys	ENSNLEG00000008912	zf-C2H2	ENSNLEP00000010858;	241	239	230	158.221	58	62	82	4.18227	2.06428	4.01683e-34	7.97085e-33	up	yes
ENSG00000249628	Nomascus_leucogenys	ENSNLEG00000008912	zf-C2H2	ENSNLEP00000010858;	30	28	30	19.8903	15	4	5	4.12658	2.04495	0.00010884	0.000413003	up	yes
ENSG00000221926	Pongo_abelii	ENSPPYG00000004736	HMGI/HMGY	ENSPPYP00000005395;ENSPPYP00000005394;	1722	1735	1521	1110.92	387	452	606	4.10803	2.03845	3.6801e-187	5.86626e-185	up	yes
ENSG00000176593	Nomascus_leucogenys	ENSNLEG00000008912	zf-C2H2	ENSNLEP00000010858;	16	17	7	8.81342	2	3	7	4.04639	2.01663	0.00564417	0.0158672	up	yes
ENSG00000128165	Pongo_abelii	ENSPPYG00000004736	HMGI/HMGY	ENSPPYP00000005395;ENSPPYP00000005394;	770	692	712	488.122	210	198	224	4.04395	2.01576	8.33342e-75	3.782e-73	up	yes
ENSG00000232973	Homo_sapiens	ENSG00000167637	zf-C2H2	ENSP00000327314;ENSP00000468708;	106	103	95	68.4173	23	37	31	3.96023	1.98558	1.23474e-14	1.12285e-13	up	yes
ENSG00000283148	Nomascus_leucogenys	ENSNLEG00000003169	HMGI/HMGY	ENSNLEP00000003825;ENSNLEP00000003824;	18	10	6	7.53638	3	4	3	3.94085	1.97851	0.0113795	0.0298868	up	yes
ENSG00000227218	Nomascus_leucogenys	ENSNLEG00000003169	HMGI/HMGY	ENSNLEP00000003825;ENSNLEP00000003824;	27	24	14	14.4226	1	11	8	3.9307	1.97478	0.000846194	0.00280244	up	yes
ENSG00000232324	Nomascus_leucogenys	ENSNLEG00000006043	zf-C2H2	ENSNLEP00000007313;	54	63	51	37.9355	12	13	28	3.83957	1.94095	2.72123e-08	1.55058e-07	up	yes
ENSG00000185345	Nomascus_leucogenys	ENSNLEG00000003169	HMGI/HMGY	ENSNLEP00000003825;ENSNLEP00000003824;	75	60	56	43.2558	22	8	30	3.77535	1.91661	4.74116e-08	2.63766e-07	up	yes
ENSG00000172382	Pongo_abelii	ENSPPYG00000002946	zf-C2H2	ENSPPYP00000003419;	53	56	51	36.5385	18	14	18	3.76618	1.9131	4.27166e-08	2.38471e-07	up	yes
ENSG00000162894	Homo_sapiens	ENSG00000254553	ZBTB	ENSP00000455300;	32	44	39	26.2206	7	14	16	3.75634	1.90933	4.2857e-06	1.95143e-05	up	yes
ENSG00000105835	Pongo_abelii	ENSPPYG00000004736	HMGI/HMGY	ENSPPYP00000005395;ENSPPYP00000005394;	24511	22112	21960	15612.4	5951	7237	8648	3.73109	1.8996	0	0	up	yes
ENSG00000250033	Nomascus_leucogenys	ENSNLEG00000003169	HMGI/HMGY	ENSNLEP00000003825;ENSNLEP00000003824;	169	113	116	90.0939	28	53	46	3.71626	1.89385	1.48199e-15	1.40949e-14	up	yes
ENSG00000150051	Homo_sapiens	ENSG00000150051	Others	--	272	242	220	167.06	55	95	86	3.69592	1.88593	6.76542e-29	1.15275e-27	up	yes
ENSG00000124882	Nomascus_leucogenys	ENSNLEG00000003169	HMGI/HMGY	ENSNLEP00000003825;ENSNLEP00000003824;	12460	11117	11111	7917.43	3039	3717	4435	3.68338	1.88103	0	0	up	yes
ENSG00000116761	Pan_troglodytes	ENSPTRG00000010752	zf-C2H2	ENSPTRP00000058398;	656	542	640	420.549	158	196	245	3.66037	1.87199	7.52021e-64	2.77873e-62	up	yes
ENSG00000160602	Pan_troglodytes	ENSPTRG00000005184	HMGI/HMGY	ENSPTRP00000051717;	255	263	246	174.715	60	85	105	3.65813	1.87111	9.57828e-32	1.80064e-30	up	yes
ENSG00000167355	Pan_troglodytes	ENSPTRG00000005184	HMGI/HMGY	ENSPTRP00000051717;	16	12	17	10.2722	3	4	8	3.64625	1.86642	0.00407188	0.0117855	up	yes
ENSG00000159650	Dasypus_novemcinctus	ENSDNOG00000035921	zf-C2H2	ENSDNOP00000020367;	10	9	13	7.33112	1	4	6	3.59178	1.8447	0.0171236	0.0429716	up	yes
ENSG00000262001	Pongo_abelii	ENSPPYG00000004736	HMGI/HMGY	ENSPPYP00000005395;ENSPPYP00000005394;	127	140	128	90.9954	40	37	54	3.58622	1.84246	9.75821e-17	9.8957e-16	up	yes
ENSG00000100889	Callithrix_jacchus	ENSCJAG00000011506	zf-C2H2	ENSCJAP00000021157;ENSCJAP00000021312;ENSCJAP00000021162;	3856	3717	3393	2517.43	983	1192	1464	3.5854	1.84214	0	0	up	yes
ENSG00000162814	Nomascus_leucogenys	ENSNLEG00000003169	HMGI/HMGY	ENSNLEP00000003825;ENSNLEP00000003824;	17	16	18	11.7966	6	4	7	3.55372	1.82933	0.00236864	0.00722428	up	yes
ENSG00000205426	Takifugu_rubripes	ENSTRUG00000005926	Homeobox	ENSTRUP00000014423;ENSTRUP00000014422;ENSTRUP00000014421;ENSTRUP00000014420;	12786	15799	14628	10045.4	4248	4441	6192	3.46764	1.79395	1.80033e-36	3.78678e-35	up	yes
ENSG00000006756	Homo_sapiens	ENSG00000149948	HMGI/HMGY	ENSP00000437621;ENSP00000437747;ENSP00000443372;ENSP00000407306;ENSP00000439317;ENSP00000377206;ENSP00000346658;ENSP00000440919;ENSP00000384026;ENSP00000377205;	102	139	116	83.9478	50	32	42	3.35969	1.74833	1.25616e-11	9.49035e-11	up	yes
ENSG00000101680	Homo_sapiens	ENSG00000149948	HMGI/HMGY	ENSP00000437621;ENSP00000437747;ENSP00000443372;ENSP00000407306;ENSP00000439317;ENSP00000377206;ENSP00000346658;ENSP00000440919;ENSP00000384026;ENSP00000377205;	104	94	105	70.756	28	36	44	3.34921	1.74382	1.10346e-12	8.92014e-12	up	yes
ENSG00000164010	Microcebus_murinus	ENSMICG00000001860	zf-MIZ	ENSMICP00000001688;	45	27	40	25.9497	5	16	20	3.33183	1.73631	4.94524e-05	0.000196546	up	yes
ENSG00000185261	Pongo_abelii	ENSPPYG00000004736	HMGI/HMGY	ENSPPYP00000005395;ENSPPYP00000005394;	19	18	19	13.1078	5	8	7	3.32721	1.73431	0.00207794	0.00640962	up	yes
ENSG00000215769	Pan_troglodytes	ENSPTRG00000005184	HMGI/HMGY	ENSPTRP00000051717;	10	18	13	9.6154	3	5	7	3.31496	1.72899	0.00966427	0.0257513	up	yes
ENSG00000164707	Nomascus_leucogenys	ENSNLEG00000008912	zf-C2H2	ENSNLEP00000010858;	17	12	9	8.73314	2	4	8	3.30381	1.72413	0.0141397	0.0363198	up	yes
ENSG00000221955	Nomascus_leucogenys	ENSNLEG00000003169	HMGI/HMGY	ENSNLEP00000003825;ENSNLEP00000003824;	67	61	51	41.5444	11	21	34	3.29452	1.72007	1.76199e-07	9.23766e-07	up	yes
ENSG00000173258	Homo_sapiens	ENSG00000173258	zf-C2H2	ENSP00000311679;	38	34	29	23.5661	9	11	17	3.26825	1.70852	4.82315e-05	0.000192089	up	yes
ENSG00000260027	Homo_sapiens	ENSG00000260027	Homeobox	ENSP00000239165;	33	27	35	22.3577	7	16	12	3.24117	1.69651	0.000122538	0.000461805	up	yes
ENSG00000257150	Pongo_abelii	ENSPPYG00000004736	HMGI/HMGY	ENSPPYP00000005395;ENSPPYP00000005394;	22	12	14	11.2601	7	1	10	3.1626	1.66111	0.0110522	0.0291074	up	yes
ENSG00000235897	Pongo_abelii	ENSPPYG00000004736	HMGI/HMGY	ENSPPYP00000005395;ENSPPYP00000005394;	107	108	114	78.0074	29	43	54	3.13614	1.64899	1.7789e-12	1.41607e-11	up	yes
ENSG00000204386	Nomascus_leucogenys	ENSNLEG00000003169	HMGI/HMGY	ENSNLEP00000003825;ENSNLEP00000003824;	940	953	936	670.99	274	346	463	3.12865	1.64554	2.8608e-82	1.45208e-80	up	yes
ENSG00000089820	Dasypus_novemcinctus	ENSDNOG00000005811	bHLH	ENSDNOP00000028008;ENSDNOP00000004495;	56	51	37	34.1741	23	14	16	3.12845	1.64545	1.0192e-05	4.4466e-05	up	yes
ENSG00000107187	Macaca_mulatta	ENSMMUG00000004882	Homeobox	ENSMMUP00000040166;ENSMMUP00000006491;ENSMMUP00000006492;	17	12	13	9.9621	5	5	6	3.0942	1.62957	0.0109167	0.0287968	up	yes
ENSG00000052802	Homo_sapiens	ENSG00000149948	HMGI/HMGY	ENSP00000437621;ENSP00000437747;ENSP00000443372;ENSP00000407306;ENSP00000439317;ENSP00000377206;ENSP00000346658;ENSP00000440919;ENSP00000384026;ENSP00000377205;	4477	4292	4037	3052.84	1310	1660	2036	3.04939	1.60852	0	0	up	yes
ENSG00000225434	Nomascus_leucogenys	ENSNLEG00000001799	zf-C2H2	ENSNLEP00000002149;	14	10	22	11.2277	11	2	4	3.04581	1.60683	0.0195336	0.0481673	up	yes
ENSG00000273079	Caenorhabditis_elegans	WBGene00003774	zf-LITAF-like	F07F6.6.1;F07F6.6.2;	18	11	14	10.228	4	6	7	3.01489	1.59211	0.0118151	0.0309422	up	yes
ENSG00000115919	Homo_sapiens	ENSG00000149948	HMGI/HMGY	ENSP00000437621;ENSP00000437747;ENSP00000443372;ENSP00000407306;ENSP00000439317;ENSP00000377206;ENSP00000346658;ENSP00000440919;ENSP00000384026;ENSP00000377205;	4603	4158	4174	3093.47	1380	1645	2090	3.01186	1.59065	9.82132e-299	3.44425e-296	up	yes
ENSG00000268041	Ovis_aries	ENSOARG00000008300	ETS	ENSOARP00000008901;	36	25	34	22.8484	15	8	14	3.00389	1.58683	0.000324449	0.00115023	up	yes
ENSG00000183671	Nomascus_leucogenys	ENSNLEG00000003169	HMGI/HMGY	ENSNLEP00000003825;ENSNLEP00000003824;	125	153	143	101.395	49	54	64	2.99741	1.58371	4.82422e-14	4.22953e-13	up	yes
ENSG00000278952	Pongo_abelii	ENSPPYG00000004736	HMGI/HMGY	ENSPPYP00000005395;ENSPPYP00000005394;	22	20	20	15.0125	10	9	5	2.96807	1.56952	0.00360955	0.0105855	up	yes
ENSG00000122367	Gadus_morhua	ENSGMOG00000008005	Homeobox	ENSGMOP00000008570;	12	24	16	12.6888	6	10	5	2.90811	1.54008	0.00966608	0.0257513	up	yes
ENSG00000145107	Homo_sapiens	ENSG00000149948	HMGI/HMGY	ENSP00000437621;ENSP00000437747;ENSP00000443372;ENSP00000407306;ENSP00000439317;ENSP00000377206;ENSP00000346658;ENSP00000440919;ENSP00000384026;ENSP00000377205;	264	210	194	160.869	83	77	113	2.89517	1.53365	1.03334e-19	1.22025e-18	up	yes
ENSG00000019549	Pongo_abelii	ENSPPYG00000018578	zf-C2H2	ENSPPYP00000020834;	248	281	208	178.27	77	112	116	2.87346	1.52279	7.2935e-21	9.01198e-20	up	yes
ENSG00000140403	Ciona_savignyi	ENSCSAVG00000003498	MYB	ENSCSAVP00000005859;ENSCSAVP00000005858;	17	18	19	13.2116	8	8	6	2.86428	1.51817	0.00672631	0.018603	up	yes
ENSG00000271933	Homo_sapiens	ENSG00000149948	HMGI/HMGY	ENSP00000437621;ENSP00000437747;ENSP00000443372;ENSP00000407306;ENSP00000439317;ENSP00000377206;ENSP00000346658;ENSP00000440919;ENSP00000384026;ENSP00000377205;	24	25	31	19.4524	7	11	16	2.85382	1.51289	0.00106506	0.00346643	up	yes
ENSG00000188732	Pan_troglodytes	ENSPTRG00000005184	HMGI/HMGY	ENSPTRP00000051717;	162	140	127	103.661	42	54	86	2.83317	1.50242	2.00719e-13	1.69801e-12	up	yes
ENSG00000105808	Nomascus_leucogenys	ENSNLEG00000003169	HMGI/HMGY	ENSNLEP00000003825;ENSNLEP00000003824;	27	7	20	12.9998	5	7	11	2.81979	1.49559	0.0131897	0.0341617	up	yes
ENSG00000010379	Dasypus_novemcinctus	ENSDNOG00000015558	ARID	ENSDNOP00000012063;ENSDNOP00000031454;ENSDNOP00000017735;	24	25	25	18.1479	12	7	12	2.80722	1.48914	0.00191974	0.00596167	up	yes
ENSG00000178809	Pelodiscus_sinensis	ENSPSIG00000009505	zf-C2H2	ENSPSIP00000010472;	17	26	21	15.6952	5	16	6	2.80649	1.48877	0.00659005	0.0182575	up	yes
ENSG00000134107	Pan_troglodytes	ENSPTRG00000014571	bHLH	ENSPTRP00000051613;	5143	4965	4718	3610.57	1629	2050	2635	2.80545	1.48823	4.46664e-286	1.43588e-283	up	yes
ENSG00000186496	Pan_troglodytes	ENSPTRG00000009970	zf-C2H2	ENSPTRP00000016951;	13	18	12	10.5613	7	5	6	2.79143	1.48101	0.017905	0.0446703	up	yes
ENSG00000059728	Pan_troglodytes	ENSPTRG00000012023	bHLH	ENSPTRP00000020645;	1282	1263	1147	902.204	453	532	585	2.78241	1.47634	9.00097e-87	4.93212e-85	up	yes
ENSG00000001084	Pongo_abelii	ENSPPYG00000004736	HMGI/HMGY	ENSPPYP00000005395;ENSPPYP00000005394;	2716	2467	2593	1901.8	919	1093	1321	2.7743	1.47213	6.60614e-160	8.43836e-158	up	yes
ENSG00000260267	Loxodonta_africana	ENSLAFG00000031295	zf-C2H2	ENSLAFP00000018356;	33	21	17	17.1821	8	12	10	2.77418	1.47206	0.00300645	0.00897931	up	yes
ENSG00000250091	Nomascus_leucogenys	ENSNLEG00000008912	zf-C2H2	ENSNLEP00000010858;	37	28	30	23.0021	8	9	25	2.77056	1.47018	0.000818337	0.00271858	up	yes
ENSG00000140105	Nomascus_leucogenys	ENSNLEG00000003169	HMGI/HMGY	ENSNLEP00000003825;ENSNLEP00000003824;	4650	4435	4186	3242.62	1535	1825	2348	2.7704	1.47009	1.2678e-277	4.00875e-275	up	yes
ENSG00000187801	Homo_sapiens	ENSG00000187801	zf-C2H2	ENSP00000399664;ENSP00000354547;	304	213	222	179.743	80	112	125	2.76749	1.46858	1.1701e-19	1.37699e-18	up	yes
ENSG00000186567	Pan_troglodytes	ENSPTRG00000029808	Homeobox	ENSPTRP00000050483;	76	56	68	48.8315	24	21	42	2.75632	1.46274	9.78495e-07	4.7732e-06	up	yes
ENSG00000174586	Homo_sapiens	ENSG00000174586	zf-C2H2	ENSP00000311183;ENSP00000402815;	22	24	17	15.4606	7	13	7	2.73486	1.45147	0.00551426	0.0155518	up	yes
ENSG00000112972	Pan_troglodytes	ENSPTRG00000005184	HMGI/HMGY	ENSPTRP00000051717;	2762	2452	2333	1850.17	925	1103	1241	2.73165	1.44977	1.22043e-149	1.39288e-147	up	yes
ENSG00000139178	Pongo_abelii	ENSPPYG00000004736	HMGI/HMGY	ENSPPYP00000005395;ENSPPYP00000005394;	131	114	95	83.1616	42	45	61	2.72485	1.44618	9.55107e-11	6.76786e-10	up	yes
ENSG00000168003	Nomascus_leucogenys	ENSNLEG00000014075	zf-C2H2	ENSNLEP00000017094;	11538	11317	10733	8253.03	3969	4723	6026	2.72013	1.44368	0	0	up	yes
ENSG00000101670	Homo_sapiens	ENSG00000149948	HMGI/HMGY	ENSP00000437621;ENSP00000437747;ENSP00000443372;ENSP00000407306;ENSP00000439317;ENSP00000377206;ENSP00000346658;ENSP00000440919;ENSP00000384026;ENSP00000377205;	2066	1912	1775	1412.73	679	804	1046	2.7094	1.43798	2.9814e-137	2.97954e-135	up	yes
ENSG00000049249	Homo_sapiens	ENSG00000149948	HMGI/HMGY	ENSP00000437621;ENSP00000437747;ENSP00000443372;ENSP00000407306;ENSP00000439317;ENSP00000377206;ENSP00000346658;ENSP00000440919;ENSP00000384026;ENSP00000377205;	47	59	80	46.1284	16	30	38	2.70293	1.43452	1.11771e-05	4.86536e-05	up	yes
ENSG00000161010	Homo_sapiens	ENSG00000149948	HMGI/HMGY	ENSP00000437621;ENSP00000437747;ENSP00000443372;ENSP00000407306;ENSP00000439317;ENSP00000377206;ENSP00000346658;ENSP00000440919;ENSP00000384026;ENSP00000377205;	1556	1295	1307	1023.25	498	640	695	2.68777	1.42641	1.99218e-87	1.10101e-85	up	yes
ENSG00000248508	Nomascus_leucogenys	ENSNLEG00000008912	zf-C2H2	ENSNLEP00000010858;	26	23	26	18.442	6	12	16	2.67473	1.41939	0.00247457	0.00751409	up	yes
ENSG00000185640	Takifugu_rubripes	ENSTRUG00000016703	Homeobox	ENSTRUP00000042740;ENSTRUP00000042741;ENSTRUP00000042742;	20	11	17	11.7289	4	5	13	2.67284	1.41837	0.0187264	0.0464081	up	yes
ENSG00000164989	Pan_troglodytes	ENSPTRG00000005184	HMGI/HMGY	ENSPTRP00000051717;	35	40	43	29.1213	8	16	31	2.6531	1.40768	0.000371474	0.00130296	up	yes
ENSG00000163683	Pongo_abelii	ENSPPYG00000004736	HMGI/HMGY	ENSPPYP00000005395;ENSPPYP00000005394;	458	458	439	336.497	182	190	238	2.63393	1.39722	1.93677e-34	3.87917e-33	up	yes
ENSG00000245498	Pongo_abelii	ENSPPYG00000008158	Homeobox	ENSPPYP00000009170;	29	22	15	16.1365	4	15	11	2.63031	1.39524	0.0077732	0.0211556	up	yes
ENSG00000135114	Pan_troglodytes	ENSPTRG00000005184	HMGI/HMGY	ENSPTRP00000051717;	736	696	640	513.104	238	320	383	2.62583	1.39277	3.52145e-53	1.08328e-51	up	yes
ENSG00000111863	Danio_rerio	ENSDARG00000037810	MYB	ENSDARP00000102304;	24	18	17	14.6745	11	7	8	2.61976	1.38943	0.00915482	0.024535	up	yes
ENSG00000285799	Gorilla_gorilla	ENSGGOG00000015116	zf-C2H2	ENSGGOP00000014752;	11	16	23	12.6007	7	6	10	2.61608	1.38741	0.0173936	0.0435811	up	yes
ENSG00000087842	Nomascus_leucogenys	ENSNLEG00000008912	zf-C2H2	ENSNLEP00000010858;	388	452	456	323.241	149	204	242	2.61104	1.38463	9.22383e-28	1.5245e-26	up	yes
ENSG00000120594	Homo_sapiens	ENSG00000149948	HMGI/HMGY	ENSP00000437621;ENSP00000437747;ENSP00000443372;ENSP00000407306;ENSP00000439317;ENSP00000377206;ENSP00000346658;ENSP00000440919;ENSP00000384026;ENSP00000377205;	169	183	174	131.321	83	60	95	2.60861	1.38328	8.72435e-13	7.10622e-12	up	yes
ENSG00000105642	Nomascus_leucogenys	ENSNLEG00000008912	zf-C2H2	ENSNLEP00000010858;	42	30	28	24.7233	10	23	12	2.6071	1.38244	0.00118176	0.00381103	up	yes
ENSG00000232860	Nomascus_leucogenys	ENSNLEG00000003169	HMGI/HMGY	ENSNLEP00000003825;ENSNLEP00000003824;	43	33	21	23.989	16	14	13	2.60233	1.3798	0.00134245	0.00428767	up	yes
ENSG00000283930	Pongo_abelii	ENSPPYG00000002205	zf-C2H2	ENSPPYP00000002576;	25	22	28	18.8568	12	12	10	2.57931	1.36699	0.00347209	0.0102228	up	yes
ENSG00000128590	Caenorhabditis_elegans	WBGene00018836	MYB	F54F2.9;	735	664	576	490.912	252	276	383	2.57828	1.36641	7.8089e-45	2.0409e-43	up	yes
ENSG00000132692	Astyanax_mexicanus	ENSAMXG00000007534	TF_bZIP	ENSAMXP00000007741;	119	91	81	72.3022	38	49	46	2.57242	1.36313	2.1835e-08	1.25455e-07	up	yes
ENSG00000119917	Nomascus_leucogenys	ENSNLEG00000008912	zf-C2H2	ENSNLEP00000010858;	1188	1095	1087	840.685	419	513	629	2.57039	1.36199	5.8465e-81	2.8694e-79	up	yes
ENSG00000155428	Pelodiscus_sinensis	ENSPSIG00000009505	zf-C2H2	ENSPSIP00000010472;	20	16	17	13.3324	11	5	8	2.55146	1.35132	0.0162935	0.0412265	up	yes
ENSG00000172216	Homo_sapiens	ENSG00000172216	C/EBP	ENSP00000305422;	4257	4132	4037	3106.22	1422	1871	2568	2.55064	1.35086	3.36791e-140	3.53045e-138	up	yes
ENSG00000221963	Homo_sapiens	ENSG00000149948	HMGI/HMGY	ENSP00000437621;ENSP00000437747;ENSP00000443372;ENSP00000407306;ENSP00000439317;ENSP00000377206;ENSP00000346658;ENSP00000440919;ENSP00000384026;ENSP00000377205;	1301	1314	1241	966.023	484	605	718	2.54114	1.34547	1.72483e-84	9.04036e-83	up	yes
ENSG00000157514	Pongo_abelii	ENSPPYG00000020613	TSC22	ENSPPYP00000023578;ENSPPYP00000023074;	536	433	490	365.9	198	216	271	2.52652	1.33715	1.5582e-32	2.99646e-31	up	yes
ENSG00000185561	Homo_sapiens	ENSG00000149948	HMGI/HMGY	ENSP00000437621;ENSP00000437747;ENSP00000443372;ENSP00000407306;ENSP00000439317;ENSP00000377206;ENSP00000346658;ENSP00000440919;ENSP00000384026;ENSP00000377205;	131	112	105	86.8469	32	69	64	2.5247	1.33611	4.3226e-09	2.62679e-08	up	yes
ENSG00000170442	Takifugu_rubripes	ENSTRUG00000005926	Homeobox	ENSTRUP00000014423;ENSTRUP00000014422;ENSTRUP00000014421;ENSTRUP00000014420;	402	277	303	245.18	124	150	188	2.52296	1.33512	2.59362e-21	3.27608e-20	up	yes
ENSG00000087074	Nomascus_leucogenys	ENSNLEG00000003169	HMGI/HMGY	ENSNLEP00000003825;ENSNLEP00000003824;	6500	6067	5724	4584.53	2224	2819	3639	2.51721	1.33182	2.36209e-269	7.00924e-267	up	yes
ENSG00000059915	Astyanax_mexicanus	ENSAMXG00000012757	ARID	ENSAMXP00000013190;	27	26	15	16.9525	9	10	13	2.51316	1.3295	0.00662273	0.0183349	up	yes
ENSG00000102804	Sus_scrofa	ENSSSCG00000023863	TSC22	ENSSSCP00000010058;	8746	8521	8023	6349.3	3122	3958	4939	2.51195	1.32881	0	0	up	yes
ENSG00000130363	Pongo_abelii	ENSPPYG00000004736	HMGI/HMGY	ENSPPYP00000005395;ENSPPYP00000005394;	311	279	254	211.2	94	135	174	2.50778	1.32641	5.63752e-21	7.01979e-20	up	yes
ENSG00000226476	Nomascus_leucogenys	ENSNLEG00000003169	HMGI/HMGY	ENSNLEP00000003825;ENSNLEP00000003824;	78	43	47	41.9354	23	27	29	2.49669	1.32002	4.86694e-05	0.000193594	up	yes
ENSG00000279443	Nomascus_leucogenys	ENSNLEG00000003169	HMGI/HMGY	ENSNLEP00000003825;ENSNLEP00000003824;	35	23	41	25.0674	16	12	19	2.49469	1.31886	0.00158477	0.00500197	up	yes
ENSG00000120068	Ovis_aries	ENSOARG00000006882	Homeobox	ENSOARP00000007367;	53	37	36	31.5732	14	26	20	2.47974	1.31019	0.000334466	0.0011824	up	yes
ENSG00000100284	Homo_sapiens	ENSG00000012817	ARID	ENSP00000444293;ENSP00000322408;ENSP00000416377;ENSP00000372256;ENSP00000398543;	648	623	571	463.936	238	279	369	2.47793	1.30914	1.86993e-43	4.70851e-42	up	yes
ENSG00000175197	Homo_sapiens	ENSG00000175197	TF_bZIP	ENSP00000448665;ENSP00000447188;ENSP00000340671;ENSP00000447803;	356	376	351	272.924	123	161	244	2.4738	1.30673	3.43211e-23	4.68829e-22	up	yes
ENSG00000069493	Pongo_abelii	ENSPPYG00000008158	Homeobox	ENSPPYP00000009170;	21	13	20	13.64	8	7	11	2.46681	1.30265	0.0164857	0.0416309	up	yes
ENSG00000065911	Nomascus_leucogenys	ENSNLEG00000003169	HMGI/HMGY	ENSNLEP00000003825;ENSNLEP00000003824;	3376	3061	2831	2338	1228	1499	1738	2.46152	1.29955	1.22295e-158	1.54172e-156	up	yes
ENSG00000205885	Pongo_abelii	ENSPPYG00000008158	Homeobox	ENSPPYP00000009170;	195	145	154	124.09	49	91	101	2.45885	1.29798	1.47654e-11	1.10643e-10	up	yes
ENSG00000151715	Nomascus_leucogenys	ENSNLEG00000003169	HMGI/HMGY	ENSNLEP00000003825;ENSNLEP00000003824;	131	131	114	94.6663	35	73	76	2.45814	1.29756	2.09466e-09	1.31602e-08	up	yes
ENSG00000204054	Nomascus_leucogenys	ENSNLEG00000009519	RHD	ENSNLEP00000011579;ENSNLEP00000011581;	799	791	763	594.992	293	388	463	2.45469	1.29554	2.40011e-52	7.25601e-51	up	yes
ENSG00000164296	Nomascus_leucogenys	ENSNLEG00000010213	HMG	ENSNLEP00000012460;ENSNLEP00000023577;	33	25	29	22.0148	15	8	19	2.45184	1.29387	0.00313258	0.00931277	up	yes
ENSG00000119508	Homo_sapiens	ENSG00000119508	NGFIB-like	ENSP00000333122;ENSP00000340301;ENSP00000378531;	35	46	39	30.5238	15	25	18	2.44876	1.29205	0.000519573	0.00178319	up	yes
ENSG00000250802	Nomascus_leucogenys	ENSNLEG00000008912	zf-C2H2	ENSNLEP00000010858;	22	28	20	17.7382	7	17	10	2.44131	1.28765	0.00846832	0.0228837	up	yes
ENSG00000089847	Takifugu_rubripes	ENSTRUG00000004360	RHD	ENSTRUP00000010369;ENSTRUP00000010371;ENSTRUP00000010370;	27	27	22	19.2537	9	16	12	2.42901	1.28037	0.00498103	0.0141661	up	yes
ENSG00000187595	Pongo_abelii	ENSPPYG00000004736	HMGI/HMGY	ENSPPYP00000005395;ENSPPYP00000005394;	32	30	25	22.1851	16	17	8	2.42669	1.27899	0.00458526	0.0131667	up	yes
ENSG00000232160	Nomascus_leucogenys	ENSNLEG00000008912	zf-C2H2	ENSNLEP00000010858;	17	24	13	13.6448	5	10	12	2.41324	1.27097	0.0203717	0.0499847	up	yes
ENSG00000196208	Nomascus_leucogenys	ENSNLEG00000008912	zf-C2H2	ENSNLEP00000010858;	250	251	249	190.625	91	123	159	2.41	1.26903	5.9334e-18	6.40422e-17	up	yes
ENSG00000162105	Macropus_eugenii	ENSMEUG00000011176	RHD	ENSMEUP00000010212;	323	279	298	228.567	98	162	191	2.39686	1.26114	2.61734e-19	3.03385e-18	up	yes
ENSG00000139410	Homo_sapiens	ENSG00000149948	HMGI/HMGY	ENSP00000437621;ENSP00000437747;ENSP00000443372;ENSP00000407306;ENSP00000439317;ENSP00000377206;ENSP00000346658;ENSP00000440919;ENSP00000384026;ENSP00000377205;	683	701	614	508.179	254	322	421	2.39531	1.26021	6.90116e-42	1.6828e-40	up	yes
ENSG00000012822	Sorex_araneus	ENSSARG00000007014	TF_bZIP	ENSSARP00000006359;	1556	1423	1335	1096.99	566	709	871	2.39349	1.25912	4.24085e-89	2.42723e-87	up	yes
ENSG00000128272	Homo_sapiens	ENSG00000128272	TF_bZIP	ENSP00000384587;ENSP00000336790;ENSP00000379912;	16229	15936	14884	11997.2	6067	7887	9641	2.38164	1.25195	0	0	up	yes
ENSG00000129595	Homo_sapiens	ENSG00000149948	HMGI/HMGY	ENSP00000437621;ENSP00000437747;ENSP00000443372;ENSP00000407306;ENSP00000439317;ENSP00000377206;ENSP00000346658;ENSP00000440919;ENSP00000384026;ENSP00000377205;	63	62	62	47.8498	29	28	36	2.38092	1.25152	1.36238e-05	5.85509e-05	up	yes
ENSG00000140044	Homo_sapiens	ENSG00000140044	TF_bZIP	ENSP00000267569;ENSP00000452769;ENSP00000399587;ENSP00000409787;ENSP00000415558;	287	314	239	213.788	95	134	199	2.36754	1.24339	2.92274e-16	2.89097e-15	up	yes
ENSG00000023909	Nomascus_leucogenys	ENSNLEG00000008912	zf-C2H2	ENSNLEP00000010858;	6556	5938	5835	4690.21	2489	3161	3610	2.35101	1.23328	7.61273e-232	1.68775e-229	up	yes
ENSG00000106686	Homo_sapiens	ENSG00000149948	HMGI/HMGY	ENSP00000437621;ENSP00000437747;ENSP00000443372;ENSP00000407306;ENSP00000439317;ENSP00000377206;ENSP00000346658;ENSP00000440919;ENSP00000384026;ENSP00000377205;	18	22	16	14.2698	5	10	14	2.3459	1.23014	0.0199633	0.0490824	up	yes
ENSG00000141519	Homo_sapiens	ENSG00000160352	zf-C2H2	ENSP00000472368;ENSP00000468862;	64	55	57	45.2431	30	28	30	2.3445	1.22928	4.08455e-05	0.000164405	up	yes
ENSG00000103021	Nomascus_leucogenys	ENSNLEG00000003169	HMGI/HMGY	ENSNLEP00000003825;ENSNLEP00000003824;	58	39	66	41.9629	22	30	31	2.33747	1.22495	0.000149659	0.000557372	up	yes
ENSG00000101104	Canis_familiaris	ENSCAFG00000003081	bHLH	ENSCAFP00000004588;ENSCAFP00000004580;	3160	2543	2585	2120.9	1126	1398	1694	2.33457	1.22316	2.09307e-106	1.48971e-104	up	yes
ENSG00000008394	Nomascus_leucogenys	ENSNLEG00000003169	HMGI/HMGY	ENSNLEP00000003825;ENSNLEP00000003824;	5969	5639	5501	4399.17	2353	2864	3582	2.31697	1.21224	1.33569e-242	3.26111e-240	up	yes
ENSG00000145362	Xiphophorus_maculatus	ENSXMAG00000000193	RHD	ENSXMAP00000000208;	1472	1326	1218	1031.28	562	694	801	2.31605	1.21167	8.02638e-74	3.52649e-72	up	yes
ENSG00000168672	Homo_sapiens	ENSG00000149948	HMGI/HMGY	ENSP00000437621;ENSP00000437747;ENSP00000443372;ENSP00000407306;ENSP00000439317;ENSP00000377206;ENSP00000346658;ENSP00000440919;ENSP00000384026;ENSP00000377205;	675	652	576	488.99	268	312	398	2.31436	1.21062	3.29428e-39	7.54632e-38	up	yes
ENSG00000181019	Nomascus_leucogenys	ENSNLEG00000003169	HMGI/HMGY	ENSNLEP00000003825;ENSNLEP00000003824;	15025	14848	13660	11198.1	5789	7461	9246	2.31182	1.20903	0	0	up	yes
ENSG00000226314	Nomascus_leucogenys	ENSNLEG00000004498	zf-C2H2	ENSNLEP00000005439;	75	67	57	51.1187	29	34	39	2.30811	1.20671	1.31324e-05	5.6565e-05	up	yes
ENSG00000100219	Gorilla_gorilla	ENSGGOG00000007154	TF_bZIP	ENSGGOP00000006999;	3574	3634	3392	2733.49	1482	1751	2264	2.29993	1.20159	4.23212e-141	4.48512e-139	up	yes
ENSG00000114796	Ficedula_albicollis	ENSFALG00000000874	ZBTB	ENSFALP00000000904;	1016	976	883	739.755	381	483	630	2.2986	1.20076	3.10467e-55	1.00139e-53	up	yes
ENSG00000055732	Nomascus_leucogenys	ENSNLEG00000008912	zf-C2H2	ENSNLEP00000010858;	711	584	598	488.132	268	324	393	2.28285	1.19084	1.23193e-36	2.60829e-35	up	yes
ENSG00000203666	Nomascus_leucogenys	ENSNLEG00000008912	zf-C2H2	ENSNLEP00000010858;	133	113	102	89.21	39	46	101	2.27988	1.18896	5.07851e-07	2.55289e-06	up	yes
ENSG00000116016	Homo_sapiens	ENSG00000116016	Others	--	3264	3069	3006	2411.68	1230	1642	2025	2.27962	1.1888	6.82336e-138	6.89052e-136	up	yes
ENSG00000135919	Homo_sapiens	ENSG00000149948	HMGI/HMGY	ENSP00000437621;ENSP00000437747;ENSP00000443372;ENSP00000407306;ENSP00000439317;ENSP00000377206;ENSP00000346658;ENSP00000440919;ENSP00000384026;ENSP00000377205;	1624	1640	1549	1245.49	686	806	1029	2.2751	1.18593	1.82078e-81	9.05135e-80	up	yes
ENSG00000135842	Nomascus_leucogenys	ENSNLEG00000008912	zf-C2H2	ENSNLEP00000010858;	7362	6918	6499	5375.87	2997	3604	4275	2.26777	1.18128	1.53806e-248	3.85274e-246	up	yes
ENSG00000197558	Callithrix_jacchus	ENSCJAG00000017928	RHD	ENSCJAP00000033111;ENSCJAP00000020309;ENSCJAP00000033112;	46	36	48	33.622	12	31	26	2.26636	1.18038	0.00102565	0.00335188	up	yes
ENSG00000155085	Nomascus_leucogenys	ENSNLEG00000008912	zf-C2H2	ENSNLEP00000010858;	55	57	65	46.0118	26	25	43	2.26147	1.17726	8.18846e-05	0.000315815	up	yes
ENSG00000245532	Pan_troglodytes	ENSPTRG00000005184	HMGI/HMGY	ENSPTRP00000051717;	7700	6044	5817	5046.33	2890	3558	3700	2.26123	1.17711	1.26004e-25	1.90318e-24	up	yes
ENSG00000109814	Homo_sapiens	ENSG00000149948	HMGI/HMGY	ENSP00000437621;ENSP00000437747;ENSP00000443372;ENSP00000407306;ENSP00000439317;ENSP00000377206;ENSP00000346658;ENSP00000440919;ENSP00000384026;ENSP00000377205;	2058	1996	1789	1513.76	861	1014	1192	2.25904	1.17571	3.77161e-93	2.25222e-91	up	yes
ENSG00000151773	Pongo_abelii	ENSPPYG00000004736	HMGI/HMGY	ENSPPYP00000005395;ENSPPYP00000005394;	177	154	156	125.827	62	80	117	2.25735	1.17463	6.32003e-11	4.5447e-10	up	yes
ENSG00000168297	Gorilla_gorilla	ENSGGOG00000013589	TSC22	ENSGGOP00000013259;	2216	2146	2054	1664.98	897	1097	1414	2.24691	1.16794	5.36361e-106	3.80343e-104	up	yes
ENSG00000023839	Pongo_abelii	ENSPPYG00000004736	HMGI/HMGY	ENSPPYP00000005395;ENSPPYP00000005394;	115	118	98	86.2624	60	58	54	2.24314	1.16552	3.19305e-07	1.63449e-06	up	yes
ENSG00000274180	Nomascus_leucogenys	ENSNLEG00000003169	HMGI/HMGY	ENSNLEP00000003825;ENSNLEP00000003824;	269	250	206	187.146	82	123	186	2.24025	1.16366	4.51657e-13	3.73406e-12	up	yes
ENSG00000284747	Pongo_abelii	ENSPPYG00000004736	HMGI/HMGY	ENSPPYP00000005395;ENSPPYP00000005394;	27	24	26	19.9074	7	14	21	2.23487	1.16019	0.00966584	0.0257513	up	yes
ENSG00000136826	Pan_troglodytes	ENSPTRG00000021230	zf-C2H2	ENSPTRP00000036269;	1613	1519	1527	1212.21	676	781	1032	2.23197	1.15832	8.40544e-77	3.94463e-75	up	yes
ENSG00000205363	Pongo_abelii	ENSPPYG00000004736	HMGI/HMGY	ENSPPYP00000005395;ENSPPYP00000005394;	59	41	49	38.7274	24	24	31	2.22947	1.1567	0.000317033	0.00112718	up	yes
ENSG00000197808	Homo_sapiens	ENSG00000197808	zf-C2H2	ENSP00000467931;ENSP00000353515;	43	44	49	35.4888	17	28	28	2.22924	1.15655	0.000549109	0.00187588	up	yes
ENSG00000157693	Pongo_abelii	ENSPPYG00000004736	HMGI/HMGY	ENSPPYP00000005395;ENSPPYP00000005394;	860	854	743	638.967	335	454	528	2.22331	1.15271	7.94096e-44	2.02332e-42	up	yes
ENSG00000085831	Callithrix_jacchus	ENSCJAG00000017928	RHD	ENSCJAP00000033111;ENSCJAP00000020309;ENSCJAP00000033112;	101	81	103	74.281	37	57	59	2.22324	1.15267	1.08541e-06	5.27607e-06	up	yes
ENSG00000145476	Pongo_abelii	ENSPPYG00000004736	HMGI/HMGY	ENSPPYP00000005395;ENSPPYP00000005394;	1226	995	1023	843.919	483	574	675	2.21951	1.15024	2.87061e-51	8.5577e-50	up	yes
ENSG00000144802	Macaca_mulatta	ENSMMUG00000002990	RHD	ENSMMUP00000003997;ENSMMUP00000035698;ENSMMUP00000003998;	728	615	625	512.387	290	325	444	2.21293	1.14596	2.84671e-35	5.85365e-34	up	yes
ENSG00000183696	Nomascus_leucogenys	ENSNLEG00000003169	HMGI/HMGY	ENSNLEP00000003825;ENSNLEP00000003824;	3130	3099	2912	2384.18	1281	1559	2110	2.20976	1.14389	3.45737e-114	2.73302e-112	up	yes
ENSG00000172748	Homo_sapiens	ENSG00000172748	zf-C2H2	ENSP00000310033;ENSP00000318719;ENSP00000381613;	33	30	27	23.6161	19	15	13	2.20847	1.14305	0.00658522	0.0182494	up	yes
ENSG00000181722	Homo_sapiens	ENSG00000181722	ZBTB	ENSP00000419153;ENSP00000420684;ENSP00000420324;ENSP00000377375;ENSP00000419902;ENSP00000349803;ENSP00000418092;ENSP00000417307;	147	112	109	95.8414	58	65	74	2.2033	1.13967	3.48999e-08	1.9677e-07	up	yes
ENSG00000142408	Pan_troglodytes	ENSPTRG00000005184	HMGI/HMGY	ENSPTRP00000051717;	105	67	81	65.8334	39	42	55	2.20319	1.13959	6.50404e-06	2.89764e-05	up	yes
ENSG00000222009	Homo_sapiens	ENSG00000149948	HMGI/HMGY	ENSP00000437621;ENSP00000437747;ENSP00000443372;ENSP00000407306;ENSP00000439317;ENSP00000377206;ENSP00000346658;ENSP00000440919;ENSP00000384026;ENSP00000377205;	270	211	217	181.54	88	134	157	2.20083	1.13805	1.15885e-13	9.95186e-13	up	yes
ENSG00000038945	Pan_troglodytes	ENSPTRG00000029808	Homeobox	ENSPTRP00000050483;	71	76	43	49.4436	29	35	38	2.19585	1.13478	0.000127063	0.000478017	up	yes
ENSG00000106853	Nomascus_leucogenys	ENSNLEG00000008912	zf-C2H2	ENSNLEP00000010858;	2594	2421	2304	1912.07	1059	1292	1621	2.19489	1.13415	3.23809e-119	2.77584e-117	up	yes
ENSG00000159917	Homo_sapiens	ENSG00000159917	zf-C2H2	ENSP00000291182;	141	99	88	85.2202	50	60	66	2.19448	1.13388	5.09831e-07	2.56151e-06	up	yes
ENSG00000136997	Homo_sapiens	ENSG00000136997	bHLH	ENSP00000367207;ENSP00000430235;	2613	2520	2384	1965.25	1075	1346	1666	2.19274	1.13273	6.69071e-119	5.68504e-117	up	yes
ENSG00000182870	Dasypus_novemcinctus	ENSDNOG00000031578	PC4	ENSDNOP00000034385;	101	75	72	64.4659	32	47	56	2.19006	1.13097	6.16081e-06	2.75451e-05	up	yes
ENSG00000105612	Nomascus_leucogenys	ENSNLEG00000003169	HMGI/HMGY	ENSNLEP00000003825;ENSNLEP00000003824;	1119	1048	1006	829.113	443	554	735	2.18971	1.13074	6.00114e-55	1.92917e-53	up	yes
ENSG00000103723	Nomascus_leucogenys	ENSNLEG00000003169	HMGI/HMGY	ENSNLEP00000003825;ENSNLEP00000003824;	25	35	41	26.7383	15	21	19	2.18835	1.12984	0.00453249	0.0130209	up	yes
ENSG00000231513	Gorilla_gorilla	ENSGGOG00000028133	E2F	ENSGGOP00000020884;	59	49	43	39.4783	27	24	30	2.18796	1.12959	0.000385282	0.00134821	up	yes
ENSG00000078177	Pan_troglodytes	ENSPTRG00000005184	HMGI/HMGY	ENSPTRP00000051717;	658	543	535	453.013	233	335	378	2.18613	1.12838	9.81882e-30	1.71545e-28	up	yes
ENSG00000250303	Pongo_abelii	ENSPPYG00000004736	HMGI/HMGY	ENSPPYP00000005395;ENSPPYP00000005394;	111	89	85	74.2122	31	65	60	2.18378	1.12683	3.39139e-06	1.55934e-05	up	yes
ENSG00000260428	Homo_sapiens	ENSG00000188686	bHLH	ENSP00000345599;	35	34	29	25.5641	12	18	24	2.1798	1.1242	0.00379112	0.0110591	up	yes
ENSG00000231721	Nomascus_leucogenys	ENSNLEG00000008912	zf-C2H2	ENSNLEP00000010858;	87	60	70	56.6758	28	44	47	2.17262	1.11943	3.01165e-05	0.000123488	up	yes
ENSG00000272068	Nomascus_leucogenys	ENSNLEG00000008912	zf-C2H2	ENSNLEP00000010858;	185	186	160	138.93	69	94	131	2.16857	1.11674	7.15152e-11	5.12402e-10	up	yes
ENSG00000197841	Homo_sapiens	ENSG00000197841	zf-C2H2	ENSP00000376065;ENSP00000420727;ENSP00000419435;	161	175	174	133.819	56	102	127	2.16795	1.11633	1.98001e-09	1.24887e-08	up	yes
ENSG00000099957	Nomascus_leucogenys	ENSNLEG00000003169	HMGI/HMGY	ENSNLEP00000003825;ENSNLEP00000003824;	35	33	36	27.4422	18	17	22	2.15982	1.11091	0.00312911	0.0093053	up	yes
ENSG00000131981	Nomascus_leucogenys	ENSNLEG00000003169	HMGI/HMGY	ENSNLEP00000003825;ENSNLEP00000003824;	3543	3507	3370	2741.8	1587	1796	2377	2.15585	1.10826	2.83091e-118	2.38439e-116	up	yes
ENSG00000183044	Nomascus_leucogenys	ENSNLEG00000003169	HMGI/HMGY	ENSNLEP00000003825;ENSNLEP00000003824;	23	27	24	19.5081	12	11	18	2.15577	1.10821	0.0129666	0.0336383	up	yes
ENSG00000136603	Pan_troglodytes	ENSPTRG00000005184	HMGI/HMGY	ENSPTRP00000051717;	503	522	466	393.24	238	260	328	2.14324	1.09979	5.20726e-26	7.99662e-25	up	yes
ENSG00000186889	Nomascus_leucogenys	ENSNLEG00000008912	zf-C2H2	ENSNLEP00000010858;	48	35	32	30.0806	18	16	30	2.14204	1.09898	0.00271352	0.00817916	up	yes
ENSG00000227398	Nomascus_leucogenys	ENSNLEG00000003169	HMGI/HMGY	ENSNLEP00000003825;ENSNLEP00000003824;	43	49	49	37.2568	21	23	35	2.1418	1.09882	0.000725951	0.00242997	up	yes
ENSG00000260916	Pongo_abelii	ENSPPYG00000004736	HMGI/HMGY	ENSPPYP00000005395;ENSPPYP00000005394;	430	367	377	309.276	178	227	245	2.14098	1.09827	2.76194e-21	3.48413e-20	up	yes
ENSG00000223745	Homo_sapiens	ENSG00000167562	zf-C2H2	ENSP00000301093;ENSP00000375662;ENSP00000444339;	726	636	606	518.33	311	374	401	2.14089	1.09821	5.27795e-32	1.00006e-30	up	yes
ENSG00000172602	Nomascus_leucogenys	ENSNLEG00000003169	HMGI/HMGY	ENSNLEP00000003825;ENSNLEP00000003824;	41	41	36	31.0197	14	26	26	2.13992	1.09756	0.00199307	0.00617707	up	yes
ENSG00000101665	Dasypus_novemcinctus	ENSDNOG00000047206	MH1	ENSDNOP00000028921;	623	652	582	490.269	294	344	391	2.13911	1.09701	1.28183e-30	2.31932e-29	up	yes
ENSG00000114423	Nomascus_leucogenys	ENSNLEG00000003169	HMGI/HMGY	ENSNLEP00000003825;ENSNLEP00000003824;	409	336	383	297.44	171	209	247	2.13866	1.0967	6.5427e-20	7.79466e-19	up	yes
ENSG00000061455	Homo_sapiens	ENSG00000061455	zf-C2H2	ENSP00000384725;	25	26	27	20.5791	12	10	22	2.13769	1.09605	0.0127162	0.0330552	up	yes
ENSG00000143013	Oreochromis_niloticus	ENSONIG00000014981	Homeobox	ENSONIP00000018861;ENSONIP00000018860;	3697	3681	3364	2834.25	1580	1932	2511	2.12957	1.09056	5.17197e-128	4.81917e-126	up	yes
ENSG00000187650	Pan_troglodytes	ENSPTRG00000005184	HMGI/HMGY	ENSPTRP00000051717;	74	76	71	58.2369	27	39	60	2.12149	1.08508	3.74127e-05	0.00015125	up	yes
ENSG00000138439	Homo_sapiens	ENSG00000149948	HMGI/HMGY	ENSP00000437621;ENSP00000437747;ENSP00000443372;ENSP00000407306;ENSP00000439317;ENSP00000377206;ENSP00000346658;ENSP00000440919;ENSP00000384026;ENSP00000377205;	387	372	352	293.724	178	188	257	2.12107	1.08479	3.59608e-20	4.32697e-19	up	yes
ENSG00000198814	Nomascus_leucogenys	ENSNLEG00000006043	zf-C2H2	ENSNLEP00000007313;	158	156	137	118.983	61	86	108	2.11681	1.08189	2.65893e-09	1.65437e-08	up	yes
ENSG00000251136	Pongo_abelii	ENSPPYG00000008158	Homeobox	ENSPPYP00000009170;	213	184	175	150.938	86	102	134	2.11523	1.08082	1.85917e-11	1.38776e-10	up	yes
ENSG00000141505	Astyanax_mexicanus	ENSAMXG00000007534	TF_bZIP	ENSAMXP00000007741;	123	106	125	93.5562	48	59	95	2.11395	1.07994	3.70924e-07	1.8872e-06	up	yes
ENSG00000074935	Homo_sapiens	ENSG00000273150	GTF2I	ENSP00000477170;	910	865	830	689.31	379	491	604	2.10876	1.07639	4.61456e-44	1.18359e-42	up	yes
ENSG00000116254	Cavia_porcellus	ENSCPOG00000013601	MYB	ENSCPOP00000012245;	69	62	41	45.223	28	25	44	2.10709	1.07525	0.00045722	0.00158186	up	yes
ENSG00000198205	Homo_sapiens	ENSG00000198205	zf-C2H2	ENSP00000351530;	166	160	161	129.41	82	89	103	2.10371	1.07294	9.68469e-10	6.28738e-09	up	yes
ENSG00000162772	Nomascus_leucogenys	ENSNLEG00000002916	TF_bZIP	ENSNLEP00000003567;ENSNLEP00000024214;	406	414	364	313.447	173	214	286	2.10277	1.07229	7.30876e-21	9.02505e-20	up	yes
ENSG00000163596	Homo_sapiens	ENSG00000149948	HMGI/HMGY	ENSP00000437621;ENSP00000437747;ENSP00000443372;ENSP00000407306;ENSP00000439317;ENSP00000377206;ENSP00000346658;ENSP00000440919;ENSP00000384026;ENSP00000377205;	92	67	68	60.1841	43	42	41	2.09916	1.06981	5.94738e-05	0.000233775	up	yes
ENSG00000111275	Nomascus_leucogenys	ENSNLEG00000003169	HMGI/HMGY	ENSNLEP00000003825;ENSNLEP00000003824;	1362	1405	1283	1074.9	618	728	960	2.09597	1.06762	2.89534e-57	9.61194e-56	up	yes
ENSG00000063438	Gorilla_gorilla	ENSGGOG00000013694	bHLH	ENSGGOP00000025739;ENSGGOP00000013361;	480	421	374	337.52	194	240	290	2.09168	1.06466	6.15333e-22	7.99228e-21	up	yes
ENSG00000174951	Homo_sapiens	ENSG00000149948	HMGI/HMGY	ENSP00000437621;ENSP00000437747;ENSP00000443372;ENSP00000407306;ENSP00000439317;ENSP00000377206;ENSP00000346658;ENSP00000440919;ENSP00000384026;ENSP00000377205;	279	209	206	183.216	85	154	158	2.0883	1.06233	7.21543e-11	5.16789e-10	up	yes
ENSG00000230724	Nomascus_leucogenys	ENSNLEG00000008912	zf-C2H2	ENSNLEP00000010858;	43	19	36	25.9547	17	13	26	2.08344	1.05897	0.0111638	0.0293801	up	yes
ENSG00000151322	Bos_taurus	ENSBTAG00000015576	bHLH	ENSBTAP00000020691;	52	61	50	43.4857	30	24	39	2.07921	1.05603	0.000549229	0.00187596	up	yes
ENSG00000182568	Pan_troglodytes	ENSPTRG00000014677	CUT	ENSPTRP00000025318;	598	512	514	432.487	292	287	341	2.07651	1.05416	9.94013e-23	1.33328e-21	up	yes
ENSG00000178607	Nomascus_leucogenys	ENSNLEG00000008912	zf-C2H2	ENSNLEP00000010858;	1094	1086	1036	856.599	495	589	767	2.07292	1.05166	5.0387e-49	1.43554e-47	up	yes
ENSG00000164463	Nomascus_leucogenys	ENSNLEG00000008912	zf-C2H2	ENSNLEP00000010858;	1719	1470	1493	1246.32	752	894	1032	2.0713	1.05054	9.15707e-62	3.27684e-60	up	yes
ENSG00000124813	Loxodonta_africana	ENSLAFG00000005054	Runt	ENSLAFP00000004227;ENSLAFP00000020453;ENSLAFP00000029315;	521	550	508	421.838	280	273	349	2.07025	1.04981	2.03648e-22	2.69778e-21	up	yes
ENSG00000154065	Homo_sapiens	ENSG00000104064	Others	--	394	368	369	301.596	173	220	259	2.06536	1.0464	5.73375e-20	6.85207e-19	up	yes
ENSG00000164418	Caenorhabditis_elegans	WBGene00003774	zf-LITAF-like	F07F6.6.1;F07F6.6.2;	73	47	47	44.2884	27	35	33	2.06386	1.04534	0.000639232	0.00216155	up	yes
ENSG00000178105	Nomascus_leucogenys	ENSNLEG00000003169	HMGI/HMGY	ENSNLEP00000003825;ENSNLEP00000003824;	2261	1968	1947	1646.49	976	1142	1452	2.0572	1.04068	5.98884e-82	3.00814e-80	up	yes
ENSG00000183426	Nomascus_leucogenys	ENSNLEG00000008912	zf-C2H2	ENSNLEP00000010858;	179	174	184	143.607	85	91	137	2.05339	1.03801	8.24795e-10	5.39492e-09	up	yes
ENSG00000198380	Nomascus_leucogenys	ENSNLEG00000008912	zf-C2H2	ENSNLEP00000010858;	5993	5375	5209	4425.63	2599	3216	3788	2.05032	1.03585	5.42045e-172	7.74442e-170	up	yes
ENSG00000229589	Homo_sapiens	ENSG00000149948	HMGI/HMGY	ENSP00000437621;ENSP00000437747;ENSP00000443372;ENSP00000407306;ENSP00000439317;ENSP00000377206;ENSP00000346658;ENSP00000440919;ENSP00000384026;ENSP00000377205;	38	32	25	25.1487	13	14	29	2.04732	1.03374	0.00999012	0.0265449	up	yes
ENSG00000248932	Homo_sapiens	ENSG00000167562	zf-C2H2	ENSP00000301093;ENSP00000375662;ENSP00000444339;	45	37	34	30.8626	17	20	31	2.04214	1.03008	0.00355428	0.0104409	up	yes
ENSG00000247498	Gorilla_gorilla	ENSGGOG00000022966	HMGI/HMGY	ENSGGOP00000023432;	52	36	32	32.0395	27	17	24	2.0421	1.03005	0.00528755	0.0149628	up	yes
ENSG00000105639	Pongo_abelii	ENSPPYG00000004736	HMGI/HMGY	ENSPPYP00000005395;ENSPPYP00000005394;	52	28	53	35.6345	21	24	33	2.03617	1.02586	0.00344962	0.0101644	up	yes
ENSG00000137474	Gorilla_gorilla	ENSGGOG00000015116	zf-C2H2	ENSGGOP00000014752;	189	154	164	135.867	86	97	112	2.03312	1.02369	2.36574e-09	1.48055e-08	up	yes
ENSG00000204947	Homo_sapiens	ENSG00000204947	zf-C2H2	ENSP00000367300;	170	147	142	123.075	76	92	100	2.02597	1.01862	1.12007e-08	6.59863e-08	up	yes
ENSG00000163491	Homo_sapiens	ENSG00000167637	zf-C2H2	ENSP00000327314;ENSP00000468708;	70	66	61	52.8725	30	46	39	2.02551	1.01828	0.000204343	0.000745484	up	yes
ENSG00000008323	Pongo_abelii	ENSPPYG00000002946	zf-C2H2	ENSPPYP00000003419;	34	25	46	28.3303	11	28	24	2.01522	1.01094	0.0117436	0.0307759	up	yes
ENSG00000109929	Nomascus_leucogenys	ENSNLEG00000003169	HMGI/HMGY	ENSNLEP00000003825;ENSNLEP00000003824;	1383	1234	1166	1016.41	608	746	882	2.009	1.00648	1.46733e-53	4.56481e-52	up	yes
ENSG00000123329	Dasypus_novemcinctus	ENSDNOG00000005811	bHLH	ENSDNOP00000028008;ENSDNOP00000004495;	39	39	27	28.0532	12	24	27	2.00334	1.00241	0.00798378	0.0216852	up	yes
ENSG00000146733	Nomascus_leucogenys	ENSNLEG00000003169	HMGI/HMGY	ENSNLEP00000003825;ENSNLEP00000003824;	1517	1541	1509	1230.68	660	955	1117	2.00296	1.00213	2.41396e-48	6.75769e-47	up	yes
ENSG00000268218	Nomascus_leucogenys	ENSNLEG00000003169	HMGI/HMGY	ENSNLEP00000003825;ENSNLEP00000003824;	85	50	73	55.5709	19	46	62	2.00259	1.00187	0.000900731	0.00297386	up	yes
ENSG00000214655	Nomascus_leucogenys	ENSNLEG00000003169	HMGI/HMGY	ENSNLEP00000003825;ENSNLEP00000003824;	1681	1575	1521	1287.1	790	912	1136	2.00049	1.00035	3.97258e-65	1.49654e-63	up	yes
ENSG00000132749	Homo_sapiens	ENSG00000149948	HMGI/HMGY	ENSP00000437621;ENSP00000437747;ENSP00000443372;ENSP00000407306;ENSP00000439317;ENSP00000377206;ENSP00000346658;ENSP00000440919;ENSP00000384026;ENSP00000377205;	113	111	106	178.098	222	250	312	0.499679	-1.00093	2.38335e-11	1.76672e-10	down	yes
ENSG00000168685	Nomascus_leucogenys	ENSNLEG00000003169	HMGI/HMGY	ENSNLEP00000003825;ENSNLEP00000003824;	277	252	201	392.469	457	570	714	0.498985	-1.00293	3.2618e-21	4.09594e-20	down	yes
ENSG00000134668	Pongo_abelii	ENSPPYG00000004736	HMGI/HMGY	ENSPPYP00000005395;ENSPPYP00000005394;	135	134	99	197.949	232	280	367	0.498815	-1.00342	7.12142e-12	5.46155e-11	down	yes
ENSG00000261061	Pan_troglodytes	ENSPTRG00000005184	HMGI/HMGY	ENSPTRP00000051717;	68	64	70	109.416	141	153	186	0.4984	-1.00462	1.81342e-07	9.49951e-07	down	yes
ENSG00000167523	Pan_troglodytes	ENSPTRG00000005184	HMGI/HMGY	ENSPTRP00000051717;	59	66	67	103.911	122	146	193	0.498336	-1.00481	3.60922e-07	1.83874e-06	down	yes
ENSG00000167775	Homo_sapiens	ENSG00000149948	HMGI/HMGY	ENSP00000437621;ENSP00000437747;ENSP00000443372;ENSP00000407306;ENSP00000439317;ENSP00000377206;ENSP00000346658;ENSP00000440919;ENSP00000384026;ENSP00000377205;	771	779	782	1261.33	1463	1771	2377	0.4977	-1.00665	4.62087e-53	1.41472e-51	down	yes
ENSG00000161692	Nomascus_leucogenys	ENSNLEG00000003169	HMGI/HMGY	ENSNLEP00000003825;ENSNLEP00000003824;	475	498	503	801.042	929	1217	1402	0.49609	-1.01133	7.35995e-38	1.60769e-36	down	yes
ENSG00000198771	Homo_sapiens	ENSG00000149948	HMGI/HMGY	ENSP00000437621;ENSP00000437747;ENSP00000443372;ENSP00000407306;ENSP00000439317;ENSP00000377206;ENSP00000346658;ENSP00000440919;ENSP00000384026;ENSP00000377205;	328	351	316	539.07	602	817	981	0.495795	-1.01218	1.60094e-28	2.70394e-27	down	yes
ENSG00000012171	Pongo_abelii	ENSPPYG00000004736	HMGI/HMGY	ENSPPYP00000005395;ENSPPYP00000005394;	199	139	149	263.038	312	371	487	0.495262	-1.01374	1.02226e-14	9.34475e-14	down	yes
ENSG00000186575	Nomascus_leucogenys	ENSNLEG00000003169	HMGI/HMGY	ENSNLEP00000003825;ENSNLEP00000003824;	253	225	233	386.185	483	566	652	0.494875	-1.01486	4.8461e-22	6.34136e-21	down	yes
ENSG00000173083	Nomascus_leucogenys	ENSNLEG00000003169	HMGI/HMGY	ENSNLEP00000003825;ENSNLEP00000003824;	186	197	188	310.118	350	444	592	0.494032	-1.01732	5.3585e-18	5.79343e-17	down	yes
ENSG00000123473	Nomascus_leucogenys	ENSNLEG00000008912	zf-C2H2	ENSNLEP00000010858;	620	622	613	1008.29	1155	1515	1815	0.493865	-1.01781	1.72101e-50	5.06792e-49	down	yes
ENSG00000236671	Homo_sapiens	ENSG00000149948	HMGI/HMGY	ENSP00000437621;ENSP00000437747;ENSP00000443372;ENSP00000407306;ENSP00000439317;ENSP00000377206;ENSP00000346658;ENSP00000440919;ENSP00000384026;ENSP00000377205;	14	13	12	21.2526	27	34	32	0.493109	-1.02002	0.0177008	0.0442188	down	yes
ENSG00000137642	Nomascus_leucogenys	ENSNLEG00000003169	HMGI/HMGY	ENSNLEP00000003825;ENSNLEP00000003824;	130	120	105	192.817	223	295	339	0.492654	-1.02135	1.49473e-12	1.19777e-11	down	yes
ENSG00000126759	Nomascus_leucogenys	ENSNLEG00000008912	zf-C2H2	ENSNLEP00000010858;	14	15	15	23.9065	23	38	47	0.492388	-1.02213	0.0120809	0.0315654	down	yes
ENSG00000163032	Pongo_abelii	ENSPPYG00000004736	HMGI/HMGY	ENSPPYP00000005395;ENSPPYP00000005394;	19	13	20	28.4827	36	45	44	0.490601	-1.02738	0.00655058	0.0181638	down	yes
ENSG00000050344	Homo_sapiens	ENSG00000050344	TF_bZIP	ENSP00000056233;	1745	1667	1459	2654.95	3199	3834	4772	0.490566	-1.02748	7.22848e-112	5.62189e-110	down	yes
ENSG00000186638	Tetraodon_nigroviridis	ENSTNIG00000005314	ZBTB	ENSTNIP00000021352;ENSTNIP00000007996;	181	139	134	247.713	313	356	428	0.489111	-1.03177	6.48566e-15	6.01709e-14	down	yes
ENSG00000142765	Nomascus_leucogenys	ENSNLEG00000008912	zf-C2H2	ENSNLEP00000010858;	34	27	33	51.4149	59	80	90	0.488947	-1.03225	0.000200291	0.00073153	down	yes
ENSG00000225077	Pongo_abelii	ENSPPYG00000004736	HMGI/HMGY	ENSPPYP00000005395;ENSPPYP00000005394;	17	17	11	24.5003	28	35	47	0.48836	-1.03398	0.00998581	0.0265371	down	yes
ENSG00000160886	Nomascus_leucogenys	ENSNLEG00000008912	zf-C2H2	ENSNLEP00000010858;	294	266	244	440.52	564	632	753	0.487645	-1.0361	3.10712e-25	4.62067e-24	down	yes
ENSG00000012124	Nomascus_leucogenys	ENSNLEG00000003169	HMGI/HMGY	ENSNLEP00000003825;ENSNLEP00000003824;	45	35	53	72.9357	78	107	144	0.487438	-1.03671	2.10852e-05	8.85073e-05	down	yes
ENSG00000120647	Callithrix_jacchus	ENSCJAG00000017928	RHD	ENSCJAP00000033111;ENSCJAP00000020309;ENSCJAP00000033112;	295	239	220	411.744	473	624	744	0.487421	-1.03676	1.32573e-23	1.84227e-22	down	yes
ENSG00000204060	Homo_sapiens	ENSG00000204060	Fork head	ENSP00000361672;	27	23	21	38.8606	43	71	58	0.487397	-1.03683	0.00156032	0.00492803	down	yes
ENSG00000144868	Gorilla_gorilla	ENSGGOG00000022966	HMGI/HMGY	ENSGGOP00000023432;	52	47	46	79.483	93	123	138	0.486952	-1.03815	2.97863e-06	1.3784e-05	down	yes
ENSG00000177469	Nomascus_leucogenys	ENSNLEG00000008912	zf-C2H2	ENSNLEP00000010858;	8353	8309	7575	13292.1	15578	19269	24625	0.486784	-1.03864	1.60887e-238	3.73877e-236	down	yes
ENSG00000187098	Pan_troglodytes	ENSPTRG00000015100	bHLH	ENSPTRP00000026065;	421	394	384	658.445	777	949	1221	0.485474	-1.04253	6.51528e-39	1.47496e-37	down	yes
ENSG00000225205	Homo_sapiens	ENSG00000149948	HMGI/HMGY	ENSP00000437621;ENSP00000437747;ENSP00000443372;ENSP00000407306;ENSP00000439317;ENSP00000377206;ENSP00000346658;ENSP00000440919;ENSP00000384026;ENSP00000377205;	22	17	18	31.4638	44	45	49	0.483794	-1.04753	0.003386	0.00999528	down	yes
ENSG00000120868	Nomascus_leucogenys	ENSNLEG00000003169	HMGI/HMGY	ENSNLEP00000003825;ENSNLEP00000003824;	510	492	436	792.272	956	1222	1348	0.483444	-1.04858	2.05598e-42	5.08407e-41	down	yes
ENSG00000002587	Pongo_abelii	ENSPPYG00000004736	HMGI/HMGY	ENSPPYP00000005395;ENSPPYP00000005394;	39	37	29	57.4436	56	79	129	0.48316	-1.04943	0.000141443	0.00052851	down	yes
ENSG00000131746	Homo_sapiens	ENSG00000149948	HMGI/HMGY	ENSP00000437621;ENSP00000437747;ENSP00000443372;ENSP00000407306;ENSP00000439317;ENSP00000377206;ENSP00000346658;ENSP00000440919;ENSP00000384026;ENSP00000377205;	103	89	71	144.806	178	215	253	0.481938	-1.05308	4.81639e-10	3.20893e-09	down	yes
ENSG00000064199	Pongo_abelii	ENSPPYG00000004736	HMGI/HMGY	ENSPPYP00000005395;ENSPPYP00000005394;	24	16	25	35.9602	38	64	59	0.481066	-1.05569	0.00207733	0.00640876	down	yes
ENSG00000146263	Nomascus_leucogenys	ENSNLEG00000003169	HMGI/HMGY	ENSNLEP00000003825;ENSNLEP00000003824;	397	357	331	601.227	762	892	1021	0.479479	-1.06046	3.10564e-34	6.1818e-33	down	yes
ENSG00000106852	Pongo_abelii	ENSPPYG00000029369	Homeobox	ENSPPYP00000023661;	28	27	18	40.088	31	73	81	0.479012	-1.06187	0.00179036	0.00559413	down	yes
ENSG00000182841	Nomascus_leucogenys	ENSNLEG00000003169	HMGI/HMGY	ENSNLEP00000003825;ENSNLEP00000003824;	73	58	73	113.276	126	189	193	0.478374	-1.06379	5.00483e-08	2.77554e-07	down	yes
ENSG00000179403	Tetraodon_nigroviridis	ENSTNIG00000016985	Homeobox	ENSTNIP00000020108;	258	219	257	407.656	471	593	775	0.477783	-1.06557	5.87622e-24	8.28513e-23	down	yes
ENSG00000066279	Drosophila_melanogaster	FBgn0259234	CG-1	FBpp0289754;FBpp0290980;FBpp0289124;FBpp0289123;FBpp0289125;	1424	1246	1284	2199.99	2758	3182	3898	0.476718	-1.06879	2.85385e-97	1.793e-95	down	yes
ENSG00000131462	Nomascus_leucogenys	ENSNLEG00000008912	zf-C2H2	ENSNLEP00000010858;	1014	946	830	1550.62	1889	2297	2766	0.476523	-1.06938	7.28833e-81	3.54993e-79	down	yes
ENSG00000215883	Homo_sapiens	ENSG00000149948	HMGI/HMGY	ENSP00000437621;ENSP00000437747;ENSP00000443372;ENSP00000407306;ENSP00000439317;ENSP00000377206;ENSP00000346658;ENSP00000440919;ENSP00000384026;ENSP00000377205;	52	44	43	77.1464	86	122	140	0.476521	-1.06939	2.4687e-06	1.15266e-05	down	yes
ENSG00000095002	Homo_sapiens	ENSG00000170954	zf-C2H2	ENSP00000396492;ENSP00000439435;ENSP00000395055;ENSP00000472911;ENSP00000243643;ENSP00000414601;ENSP00000388787;	1084	1020	1008	1734.74	2168	2535	3057	0.475882	-1.07133	2.40502e-87	1.32537e-85	down	yes
ENSG00000138376	Homo_sapiens	ENSG00000104064	Others	--	399	363	360	624.417	730	915	1172	0.475668	-1.07197	1.02039e-38	2.29386e-37	down	yes
ENSG00000169607	Nomascus_leucogenys	ENSNLEG00000008912	zf-C2H2	ENSNLEP00000010858;	508	489	542	859.955	1042	1253	1569	0.475072	-1.07378	1.20765e-44	3.14773e-43	down	yes
ENSG00000213347	Pan_troglodytes	ENSPTRG00000034491	bHLH	ENSPTRP00000055931;	240	198	195	352.368	428	515	641	0.475029	-1.07391	4.23606e-23	5.77014e-22	down	yes
ENSG00000206417	Pan_troglodytes	ENSPTRG00000010773	zf-C2H2	ENSPTRP00000058362;	26	21	11	32.1164	39	55	49	0.47485	-1.07446	0.00358149	0.0105096	down	yes
ENSG00000177359	Nomascus_leucogenys	ENSNLEG00000008912	zf-C2H2	ENSNLEP00000010858;	49	29	33	61.6544	75	88	115	0.474036	-1.07693	3.5937e-05	0.000145804	down	yes
ENSG00000184992	Homo_sapiens	ENSG00000149948	HMGI/HMGY	ENSP00000437621;ENSP00000437747;ENSP00000443372;ENSP00000407306;ENSP00000439317;ENSP00000377206;ENSP00000346658;ENSP00000440919;ENSP00000384026;ENSP00000377205;	672	602	537	1010.52	1310	1438	1767	0.473986	-1.07708	8.61727e-50	2.48445e-48	down	yes
ENSG00000130005	Pan_troglodytes	ENSPTRG00000005184	HMGI/HMGY	ENSPTRP00000051717;	465	503	415	772.871	945	1053	1493	0.473222	-1.07941	1.30666e-37	2.83496e-36	down	yes
ENSG00000120913	Homo_sapiens	ENSG00000273150	GTF2I	ENSP00000477170;	82	86	73	134.768	154	195	263	0.471823	-1.08368	4.64331e-10	3.09683e-09	down	yes
ENSG00000117519	Nomascus_leucogenys	ENSNLEG00000008912	zf-C2H2	ENSNLEP00000010858;	4524	4217	4074	7182.29	8586	10617	13211	0.471208	-1.08556	1.05014e-275	3.2151e-273	down	yes
ENSG00000113810	Homo_sapiens	ENSG00000167562	zf-C2H2	ENSP00000301093;ENSP00000375662;ENSP00000444339;	2362	2128	2171	3737.34	4586	5625	6580	0.470951	-1.08635	1.33096e-150	1.54647e-148	down	yes
ENSG00000152284	Homo_sapiens	ENSG00000152284	HMG	ENSP00000282111;	107	97	88	163.449	185	247	310	0.470409	-1.08801	4.42323e-12	3.42769e-11	down	yes
ENSG00000249115	Nomascus_leucogenys	ENSNLEG00000003169	HMGI/HMGY	ENSNLEP00000003825;ENSNLEP00000003824;	401	380	419	675.227	849	944	1247	0.470194	-1.08867	7.91026e-37	1.68217e-35	down	yes
ENSG00000156463	Pan_troglodytes	ENSPTRG00000005184	HMGI/HMGY	ENSPTRP00000051717;	361	380	310	590.403	723	903	1027	0.469942	-1.08945	1.18965e-34	2.39269e-33	down	yes
ENSG00000127191	Xiphophorus_maculatus	ENSXMAG00000011827	DM	ENSXMAP00000011849;	692	629	574	1063.83	1317	1593	1872	0.469857	-1.08971	1.53298e-61	5.45535e-60	down	yes
ENSG00000130816	Nomascus_leucogenys	ENSNLEG00000003169	HMGI/HMGY	ENSNLEP00000003825;ENSNLEP00000003824;	5220	5239	4743	8542.86	10229	12646	15717	0.469625	-1.09042	1.50912e-242	3.6385e-240	down	yes
ENSG00000062038	Nomascus_leucogenys	ENSNLEG00000008912	zf-C2H2	ENSNLEP00000010858;	26	30	22	43.9051	52	69	77	0.468302	-1.09449	0.000282743	0.00101259	down	yes
ENSG00000108821	Nomascus_leucogenys	ENSNLEG00000008912	zf-C2H2	ENSNLEP00000010858;	106	107	98	175.208	177	292	333	0.466383	-1.10041	8.82314e-12	6.71855e-11	down	yes
ENSG00000090889	Tetraodon_nigroviridis	ENSTNIG00000005314	ZBTB	ENSTNIP00000021352;ENSTNIP00000007996;	800	853	747	1357.09	1568	2063	2536	0.465282	-1.10382	8.46443e-69	3.40839e-67	down	yes
ENSG00000186862	Pongo_abelii	ENSPPYG00000004736	HMGI/HMGY	ENSPPYP00000005395;ENSPPYP00000005394;	37	47	24	61.0248	79	91	104	0.464993	-1.10472	4.18874e-05	0.000168327	down	yes
ENSG00000122133	Nomascus_leucogenys	ENSNLEG00000008912	zf-C2H2	ENSNLEP00000010858;	365	367	330	601.041	717	910	1096	0.464627	-1.10586	1.09183e-39	2.53726e-38	down	yes
ENSG00000049759	Gorilla_gorilla	ENSGGOG00000022966	HMGI/HMGY	ENSGGOP00000023432;	2047	1860	1863	3268.92	3936	4923	5948	0.463946	-1.10797	3.92154e-164	5.14549e-162	down	yes
ENSG00000166483	Pongo_abelii	ENSPPYG00000004736	HMGI/HMGY	ENSPPYP00000005395;ENSPPYP00000005394;	416	358	344	632.729	773	934	1159	0.463829	-1.10834	1.44278e-41	3.50041e-40	down	yes
ENSG00000125450	Pan_troglodytes	ENSPTRG00000005184	HMGI/HMGY	ENSPTRP00000051717;	920	869	895	1522.03	1806	2303	2795	0.463776	-1.1085	5.12473e-85	2.73055e-83	down	yes
ENSG00000196230	Pan_troglodytes	ENSPTRG00000029808	Homeobox	ENSPTRP00000050483;	10706	10566	9699	17561.1	20520	26001	33478	0.463381	-1.10973	1.11966e-256	3.0417e-254	down	yes
ENSG00000229124	Takifugu_rubripes	ENSTRUG00000016703	Homeobox	ENSTRUP00000042740;ENSTRUP00000042741;ENSTRUP00000042742;	37	41	38	65.7462	78	77	148	0.463094	-1.11062	2.25776e-05	9.44023e-05	down	yes
ENSG00000251602	Homo_sapiens	ENSG00000149948	HMGI/HMGY	ENSP00000437621;ENSP00000437747;ENSP00000443372;ENSP00000407306;ENSP00000439317;ENSP00000377206;ENSP00000346658;ENSP00000440919;ENSP00000384026;ENSP00000377205;	20	15	15	28.4692	41	48	36	0.462672	-1.11194	0.00437185	0.0125876	down	yes
ENSG00000174501	Homo_sapiens	ENSG00000148513	Others	--	194	176	147	293.407	378	473	462	0.462565	-1.11227	1.44768e-17	1.53422e-16	down	yes
ENSG00000272655	Homo_sapiens	ENSG00000149948	HMGI/HMGY	ENSP00000437621;ENSP00000437747;ENSP00000443372;ENSP00000407306;ENSP00000439317;ENSP00000377206;ENSP00000346658;ENSP00000440919;ENSP00000384026;ENSP00000377205;	98	73	58	129.254	156	194	237	0.462481	-1.11253	1.59819e-09	1.01601e-08	down	yes
ENSG00000182175	Nomascus_leucogenys	ENSNLEG00000008912	zf-C2H2	ENSNLEP00000010858;	21	12	14	26.6968	36	43	40	0.461233	-1.11643	0.00469413	0.0134473	down	yes
ENSG00000176974	Nomascus_leucogenys	ENSNLEG00000003169	HMGI/HMGY	ENSNLEP00000003825;ENSNLEP00000003824;	383	390	352	641.449	782	980	1145	0.460103	-1.11997	2.89571e-42	7.14225e-41	down	yes
ENSG00000065361	Nomascus_leucogenys	ENSNLEG00000006043	zf-C2H2	ENSNLEP00000007313;	67	68	51	105.733	113	190	178	0.45998	-1.12036	6.77662e-08	3.70696e-07	down	yes
ENSG00000151882	Nomascus_leucogenys	ENSNLEG00000003169	HMGI/HMGY	ENSNLEP00000003825;ENSNLEP00000003824;	15	17	14	26.3141	31	49	38	0.45937	-1.12227	0.00478169	0.0136697	down	yes
ENSG00000109881	Nomascus_leucogenys	ENSNLEG00000008912	zf-C2H2	ENSNLEP00000010858;	252	201	186	364.469	452	515	695	0.457295	-1.1288	4.38425e-24	6.21334e-23	down	yes
ENSG00000237686	Nomascus_leucogenys	ENSNLEG00000008912	zf-C2H2	ENSNLEP00000010858;	12	15	12	22.2498	16	45	43	0.456603	-1.13099	0.0115821	0.0303898	down	yes
ENSG00000090539	Pan_troglodytes	ENSPTRG00000023657	zf-C2H2	ENSPTRP00000058598;ENSPTRP00000018378;	18	15	13	26.2557	30	42	48	0.456412	-1.13159	0.00350982	0.0103278	down	yes
ENSG00000125285	Dasypus_novemcinctus	ENSDNOG00000044507	HMG	ENSDNOP00000020471;	32	37	21	51.6995	77	60	96	0.454409	-1.13794	0.000141444	0.00052851	down	yes
ENSG00000280287	Nomascus_leucogenys	ENSNLEG00000008912	zf-C2H2	ENSNLEP00000010858;	60	44	51	88.8273	94	134	184	0.453241	-1.14165	1.99555e-07	1.04281e-06	down	yes
ENSG00000170989	Nomascus_leucogenys	ENSNLEG00000008912	zf-C2H2	ENSNLEP00000010858;	15	16	10	23.5751	30	36	41	0.452926	-1.14265	0.00554488	0.0156268	down	yes
ENSG00000143494	Homo_sapiens	ENSG00000149948	HMGI/HMGY	ENSP00000437621;ENSP00000437747;ENSP00000443372;ENSP00000407306;ENSP00000439317;ENSP00000377206;ENSP00000346658;ENSP00000440919;ENSP00000384026;ENSP00000377205;	26	17	16	33.91	43	53	58	0.451569	-1.14698	0.00093387	0.00307643	down	yes
ENSG00000165304	Pan_troglodytes	ENSPTRG00000001856	ARID	ENSPTRP00000003106;	1269	1158	1155	2068.52	2551	3103	3787	0.451327	-1.14776	2.61752e-124	2.34822e-122	down	yes
ENSG00000197385	Homo_sapiens	ENSG00000197385	zf-C2H2	ENSP00000373274;	57	53	67	102.571	128	145	196	0.450986	-1.14885	1.51092e-08	8.78585e-08	down	yes
ENSG00000018236	Pan_troglodytes	ENSPTRG00000010773	zf-C2H2	ENSPTRP00000058362;	18	14	15	27.1129	29	50	45	0.45061	-1.15005	0.00307209	0.0091541	down	yes
ENSG00000267041	Homo_sapiens	ENSG00000267041	zf-C2H2	ENSP00000464976;	162	171	147	277.721	324	466	477	0.450243	-1.15122	3.07438e-19	3.55507e-18	down	yes
ENSG00000010292	Homo_sapiens	ENSG00000167562	zf-C2H2	ENSP00000301093;ENSP00000375662;ENSP00000444339;	3945	3766	3504	6485.03	7756	9763	12223	0.449991	-1.15203	1.57885e-267	4.61406e-265	down	yes
ENSG00000111087	Homo_sapiens	ENSG00000111087	zf-C2H2	ENSP00000228682;ENSP00000434408;ENSP00000437607;ENSP00000441006;ENSP00000436671;	11	12	8	17.8882	18	35	29	0.4497	-1.15297	0.0164516	0.0415609	down	yes
ENSG00000149564	Nomascus_leucogenys	ENSNLEG00000008912	zf-C2H2	ENSNLEP00000010858;	504	464	431	808.315	948	1185	1591	0.44959	-1.15332	1.32251e-51	3.96711e-50	down	yes
ENSG00000120802	Nomascus_leucogenys	ENSNLEG00000003169	HMGI/HMGY	ENSNLEP00000003825;ENSNLEP00000003824;	2470	2312	2142	4018.82	4920	6131	7346	0.447572	-1.15981	8.63197e-210	1.71643e-207	down	yes
ENSG00000185551	Oryctolagus_cuniculus	ENSOCUG00000013520	RXR-like	ENSOCUP00000011627;	1167	1140	1151	2013.28	2500	3001	3716	0.446792	-1.16233	9.43168e-113	7.36511e-111	down	yes
ENSG00000100629	Homo_sapiens	ENSG00000012817	ARID	ENSP00000444293;ENSP00000322408;ENSP00000416377;ENSP00000372256;ENSP00000398543;	133	110	117	209.684	271	326	356	0.446314	-1.16387	3.76496e-16	3.69372e-15	down	yes
ENSG00000138180	Pan_troglodytes	ENSPTRG00000010773	zf-C2H2	ENSPTRP00000058362;	1550	1440	1308	2500.07	3055	3771	4648	0.445829	-1.16544	3.37449e-147	3.74064e-145	down	yes
ENSG00000183655	Monodelphis_domestica	ENSMODG00000000778	ZBTB	ENSMODP00000000929;	204	167	158	307.516	391	422	601	0.445324	-1.16707	8.07687e-22	1.04625e-20	down	yes
ENSG00000163701	Homo_sapiens	ENSG00000149948	HMGI/HMGY	ENSP00000437621;ENSP00000437747;ENSP00000443372;ENSP00000407306;ENSP00000439317;ENSP00000377206;ENSP00000346658;ENSP00000440919;ENSP00000384026;ENSP00000377205;	31	21	25	44.6962	45	81	81	0.445022	-1.16805	0.000157183	0.000583815	down	yes
ENSG00000081923	Homo_sapiens	ENSG00000149948	HMGI/HMGY	ENSP00000437621;ENSP00000437747;ENSP00000443372;ENSP00000407306;ENSP00000439317;ENSP00000377206;ENSP00000346658;ENSP00000440919;ENSP00000384026;ENSP00000377205;	137	153	138	249.994	293	395	462	0.444471	-1.16984	3.63783e-19	4.19907e-18	down	yes
ENSG00000110200	Homo_sapiens	ENSG00000273150	GTF2I	ENSP00000477170;	30	19	22	41.3108	52	59	79	0.444009	-1.17134	0.000191791	0.000702754	down	yes
ENSG00000114346	Nomascus_leucogenys	ENSNLEG00000003169	HMGI/HMGY	ENSNLEP00000003825;ENSNLEP00000003824;	2118	1921	1956	3512.66	4449	5289	6354	0.442234	-1.17712	9.49497e-170	1.30814e-167	down	yes
ENSG00000125398	Gorilla_gorilla	ENSGGOG00000001756	HMG	ENSGGOP00000001729;ENSGGOP00000016791;	946	953	873	1627.88	1983	2425	3104	0.440392	-1.18314	5.91757e-102	3.99084e-100	down	yes
ENSG00000104881	Homo_sapiens	ENSG00000149948	HMGI/HMGY	ENSP00000437621;ENSP00000437747;ENSP00000443372;ENSP00000407306;ENSP00000439317;ENSP00000377206;ENSP00000346658;ENSP00000440919;ENSP00000384026;ENSP00000377205;	697	651	640	1166.72	1385	1688	2340	0.440219	-1.18371	4.88921e-68	1.93641e-66	down	yes
ENSG00000065717	Caenorhabditis_elegans	WBGene00012757	zf-LITAF-like	Y41C4A.11;	56	35	39	76.1292	90	120	142	0.439083	-1.18744	4.71645e-07	2.37833e-06	down	yes
ENSG00000149548	Pongo_abelii	ENSPPYG00000002946	zf-C2H2	ENSPPYP00000003419;	68	37	48	89.5434	98	150	168	0.438683	-1.18875	1.84574e-07	9.66359e-07	down	yes
ENSG00000134333	Gorilla_gorilla	ENSGGOG00000015116	zf-C2H2	ENSGGOP00000014752;	9342	9054	8221	15674.4	19260	23763	29273	0.4384	-1.18968	0	0	down	yes
ENSG00000125885	Pongo_abelii	ENSPPYG00000004736	HMGI/HMGY	ENSPPYP00000005395;ENSPPYP00000005394;	1224	1103	1147	2047.8	2437	3194	3835	0.437983	-1.19105	1.72195e-118	1.45671e-116	down	yes
ENSG00000204922	Pongo_abelii	ENSPPYG00000004736	HMGI/HMGY	ENSPPYP00000005395;ENSPPYP00000005394;	28	31	19	45.7756	54	62	98	0.43759	-1.19235	9.10157e-05	0.000349286	down	yes
ENSG00000179841	Pan_troglodytes	ENSPTRG00000005184	HMGI/HMGY	ENSPTRP00000051717;	51	47	39	80.6731	100	123	149	0.437518	-1.19258	8.88414e-08	4.81611e-07	down	yes
ENSG00000182378	Nomascus_leucogenys	ENSNLEG00000003169	HMGI/HMGY	ENSNLEP00000003825;ENSNLEP00000003824;	33	39	44	68.8789	86	109	121	0.437089	-1.194	1.39725e-06	6.69404e-06	down	yes
ENSG00000132561	Tetraodon_nigroviridis	ENSTNIG00000016985	Homeobox	ENSTNIP00000020108;	41	48	39	75.4007	76	119	160	0.436575	-1.1957	6.88344e-07	3.41218e-06	down	yes
ENSG00000087586	Pan_troglodytes	ENSPTRG00000005184	HMGI/HMGY	ENSPTRP00000051717;	1799	1694	1545	2978.04	3668	4540	5549	0.43581	-1.19823	1.3937e-179	2.06782e-177	down	yes
ENSG00000003249	Nomascus_leucogenys	ENSNLEG00000008912	zf-C2H2	ENSNLEP00000010858;	171	131	128	253.992	354	337	474	0.43576	-1.1984	1.17818e-17	1.25551e-16	down	yes
ENSG00000011332	Homo_sapiens	ENSG00000133884	Others	--	138	134	110	225.908	288	342	410	0.43557	-1.19902	1.0718e-18	1.20261e-17	down	yes
ENSG00000170629	Ochotona_princeps	ENSOPRG00000014909	T-box	ENSOPRP00000013607;	58	54	60	102.128	139	139	191	0.435313	-1.19988	3.61707e-09	2.21832e-08	down	yes
ENSG00000275437	Nomascus_leucogenys	ENSNLEG00000008912	zf-C2H2	ENSNLEP00000010858;	19	14	14	27.7497	30	49	50	0.434236	-1.20345	0.00167016	0.00524743	down	yes
ENSG00000239672	Homo_sapiens	ENSG00000011052	Others	--	325	322	256	535.768	531	777	1249	0.43209	-1.2106	3.80813e-09	2.32809e-08	down	yes
ENSG00000106351	Nomascus_leucogenys	ENSNLEG00000008912	zf-C2H2	ENSNLEP00000010858;	252	254	194	415.459	507	582	850	0.431945	-1.21108	9.37186e-28	1.54764e-26	down	yes
ENSG00000174442	Nomascus_leucogenys	ENSNLEG00000003169	HMGI/HMGY	ENSNLEP00000003825;ENSNLEP00000003824;	568	550	571	1009.11	1283	1493	1894	0.430654	-1.2154	1.09589e-68	4.40363e-67	down	yes
ENSG00000115414	Nomascus_leucogenys	ENSNLEG00000003169	HMGI/HMGY	ENSNLEP00000003825;ENSNLEP00000003824;	1457	1302	1267	2400.8	2942	3806	4368	0.430472	-1.21601	2.82221e-142	3.00744e-140	down	yes
ENSG00000173207	Nomascus_leucogenys	ENSNLEG00000008479	SAND	ENSNLEP00000010363;	1691	1679	1496	2904.92	3678	4253	5541	0.43004	-1.21746	2.72453e-151	3.22398e-149	down	yes
ENSG00000076248	Pan_troglodytes	ENSPTRG00000011949	RHD	ENSPTRP00000020529;	1052	1040	991	1844.41	2247	2823	3506	0.428968	-1.22106	4.14161e-123	3.68127e-121	down	yes
ENSG00000168032	Nomascus_leucogenys	ENSNLEG00000010804	zf-C2H2	ENSNLEP00000013129;	14	15	10	23.3614	33	34	40	0.428555	-1.22245	0.00338099	0.00998354	down	yes
ENSG00000118193	Nomascus_leucogenys	ENSNLEG00000003169	HMGI/HMGY	ENSNLEP00000003825;ENSNLEP00000003824;	780	708	714	1318.7	1686	1971	2450	0.428502	-1.22263	1.87602e-92	1.10996e-90	down	yes
ENSG00000166451	Nomascus_leucogenys	ENSNLEG00000008912	zf-C2H2	ENSNLEP00000010858;	226	238	220	410.064	514	639	745	0.428485	-1.22269	8.07973e-33	1.56311e-31	down	yes
ENSG00000012048	Homo_sapiens	ENSG00000149948	HMGI/HMGY	ENSP00000437621;ENSP00000437747;ENSP00000443372;ENSP00000407306;ENSP00000439317;ENSP00000377206;ENSP00000346658;ENSP00000440919;ENSP00000384026;ENSP00000377205;	414	379	316	663.459	819	1041	1220	0.427591	-1.2257	1.3136e-48	3.69879e-47	down	yes
ENSG00000176406	Pan_troglodytes	ENSPTRG00000005184	HMGI/HMGY	ENSPTRP00000051717;	44	38	57	84.0611	106	133	150	0.42544	-1.23297	7.72389e-08	4.20486e-07	down	yes
ENSG00000135451	Callithrix_jacchus	ENSCJAG00000017928	RHD	ENSCJAP00000033111;ENSCJAP00000020309;ENSCJAP00000033112;	721	701	657	1251.05	1545	1945	2329	0.425342	-1.2333	2.30505e-93	1.38074e-91	down	yes
ENSG00000080839	Homo_sapiens	ENSG00000149948	HMGI/HMGY	ENSP00000437621;ENSP00000437747;ENSP00000443372;ENSP00000407306;ENSP00000439317;ENSP00000377206;ENSP00000346658;ENSP00000440919;ENSP00000384026;ENSP00000377205;	490	473	478	868.484	1084	1365	1582	0.42512	-1.23406	1.38752e-64	5.16649e-63	down	yes
ENSG00000104833	Gorilla_gorilla	ENSGGOG00000015116	zf-C2H2	ENSGGOP00000014752;	71	76	77	135.856	177	205	248	0.422531	-1.24287	1.27504e-12	1.02514e-11	down	yes
ENSG00000025770	Pongo_abelii	ENSPPYG00000004736	HMGI/HMGY	ENSPPYP00000005395;ENSPPYP00000005394;	427	345	338	670.912	801	1052	1292	0.420905	-1.24843	2.91971e-50	8.49403e-49	down	yes
ENSG00000146918	Homo_sapiens	ENSG00000149948	HMGI/HMGY	ENSP00000437621;ENSP00000437747;ENSP00000443372;ENSP00000407306;ENSP00000439317;ENSP00000377206;ENSP00000346658;ENSP00000440919;ENSP00000384026;ENSP00000377205;	1331	1196	1229	2279.36	2860	3524	4245	0.420372	-1.25026	5.46236e-151	6.38533e-149	down	yes
ENSG00000138182	Tetraodon_nigroviridis	ENSTNIG00000005314	ZBTB	ENSTNIP00000021352;ENSTNIP00000007996;	986	786	773	1543.32	2009	2299	2881	0.419466	-1.25337	2.20894e-88	1.24216e-86	down	yes
ENSG00000172167	Pongo_abelii	ENSPPYG00000004736	HMGI/HMGY	ENSPPYP00000005395;ENSPPYP00000005394;	262	242	246	456.753	549	736	854	0.418067	-1.25819	2.94967e-38	6.56966e-37	down	yes
ENSG00000161800	Dasypus_novemcinctus	ENSDNOG00000005811	bHLH	ENSDNOP00000028008;ENSDNOP00000004495;	1902	1792	1753	3321.86	4195	5023	6322	0.417415	-1.26044	5.15061e-209	1.01372e-206	down	yes
ENSG00000172014	Homo_sapiens	ENSG00000148513	Others	--	14	7	11	19.5463	27	32	31	0.416507	-1.26359	0.00633737	0.0176462	down	yes
ENSG00000137501	Nomascus_leucogenys	ENSNLEG00000003169	HMGI/HMGY	ENSNLEP00000003825;ENSNLEP00000003824;	118	93	99	189.422	253	264	369	0.415644	-1.26658	9.13686e-17	9.27535e-16	down	yes
ENSG00000164087	Caenorhabditis_elegans	WBGene00012757	zf-LITAF-like	Y41C4A.11;	378	334	321	632.389	798	956	1213	0.414431	-1.2708	1.7842e-53	5.5062e-52	down	yes
ENSG00000176244	Pan_troglodytes	ENSPTRG00000005184	HMGI/HMGY	ENSPTRP00000051717;	84	72	73	140.07	160	218	286	0.413818	-1.27293	2.08472e-13	1.76206e-12	down	yes
ENSG00000144810	Nomascus_leucogenys	ENSNLEG00000003169	HMGI/HMGY	ENSNLEP00000003825;ENSNLEP00000003824;	119	118	96	204.111	240	333	389	0.413021	-1.27571	1.08445e-18	1.21539e-17	down	yes
ENSG00000051341	Homo_sapiens	ENSG00000149948	HMGI/HMGY	ENSP00000437621;ENSP00000437747;ENSP00000443372;ENSP00000407306;ENSP00000439317;ENSP00000377206;ENSP00000346658;ENSP00000440919;ENSP00000384026;ENSP00000377205;	239	179	195	376.156	481	581	700	0.412827	-1.27639	2.39661e-31	4.46625e-30	down	yes
ENSG00000154839	Nomascus_leucogenys	ENSNLEG00000003169	HMGI/HMGY	ENSNLEP00000003825;ENSNLEP00000003824;	196	183	155	327.438	383	552	606	0.412743	-1.27668	2.91388e-27	4.74686e-26	down	yes
ENSG00000126215	Homo_sapiens	ENSG00000160352	zf-C2H2	ENSP00000472368;ENSP00000468862;	222	166	158	334.215	391	509	686	0.41201	-1.27925	5.00822e-26	7.70323e-25	down	yes
ENSG00000123416	Gallus_gallus	ENSGALG00000000427	ARID	ENSGALP00000000581;	2457	2387	2412	4469.69	5511	6675	8904	0.411924	-1.27955	2.73391e-182	4.18505e-180	down	yes
ENSG00000117632	Pongo_abelii	ENSPPYG00000004736	HMGI/HMGY	ENSPPYP00000005395;ENSPPYP00000005394;	2498	2377	2366	4459.06	5399	6920	8717	0.411679	-1.28041	1.53925e-224	3.33584e-222	down	yes
ENSG00000100749	Homo_sapiens	ENSG00000119725	zf-C2H2	ENSP00000407130;ENSP00000451748;ENSP00000451763;ENSP00000323293;ENSP00000334170;ENSP00000442228;	500	428	429	839.651	1067	1302	1580	0.408436	-1.29182	3.0349e-70	1.2643e-68	down	yes
ENSG00000137807	Tetraodon_nigroviridis	ENSTNIG00000005314	ZBTB	ENSTNIP00000021352;ENSTNIP00000007996;	1385	1257	1226	2401.32	3155	3581	4551	0.406927	-1.29716	9.82776e-155	1.20737e-152	down	yes
ENSG00000137094	Petromyzon_marinus	ENSPMAG00000001420	MYB	ENSPMAP00000001570;	143	162	167	294.326	353	461	581	0.405718	-1.30145	4.34087e-25	6.42076e-24	down	yes
ENSG00000166851	Nomascus_leucogenys	ENSNLEG00000003169	HMGI/HMGY	ENSNLEP00000003825;ENSNLEP00000003824;	941	904	838	1668.56	2116	2518	3247	0.405707	-1.30149	1.69204e-127	1.56904e-125	down	yes
ENSG00000179029	Nomascus_leucogenys	ENSNLEG00000003169	HMGI/HMGY	ENSNLEP00000003825;ENSNLEP00000003824;	105	64	92	162.275	197	256	316	0.404893	-1.30439	2.702e-14	2.40499e-13	down	yes
ENSG00000161980	Homo_sapiens	ENSG00000149948	HMGI/HMGY	ENSP00000437621;ENSP00000437747;ENSP00000443372;ENSP00000407306;ENSP00000439317;ENSP00000377206;ENSP00000346658;ENSP00000440919;ENSP00000384026;ENSP00000377205;	177	171	162	317.296	347	475	706	0.404103	-1.30721	6.62267e-24	9.32395e-23	down	yes
ENSG00000138587	Homo_sapiens	ENSG00000178928	Homeobox	ENSP00000438832;	14	16	16	28.615	29	37	74	0.403764	-1.30842	0.000937845	0.00308847	down	yes
ENSG00000167889	Callithrix_jacchus	ENSCJAG00000011506	zf-C2H2	ENSCJAP00000021157;ENSCJAP00000021312;ENSCJAP00000021162;	84	90	83	160.843	222	216	320	0.403422	-1.30964	6.28438e-15	5.8416e-14	down	yes
ENSG00000162063	Pongo_abelii	ENSPPYG00000004736	HMGI/HMGY	ENSPPYP00000005395;ENSPPYP00000005394;	306	271	273	530.165	626	848	1047	0.40334	-1.30993	7.33957e-46	1.94994e-44	down	yes
ENSG00000123485	Pan_troglodytes	ENSPTRG00000005184	HMGI/HMGY	ENSPTRP00000051717;	1618	1504	1484	2880.14	3520	4582	5550	0.402637	-1.31245	6.02937e-195	1.05722e-192	down	yes
ENSG00000135643	Pongo_abelii	ENSPPYG00000004736	HMGI/HMGY	ENSPPYP00000005395;ENSPPYP00000005394;	21	20	18	37.0504	55	46	73	0.401196	-1.31762	9.94228e-05	0.000379435	down	yes
ENSG00000163535	Nomascus_leucogenys	ENSNLEG00000003169	HMGI/HMGY	ENSNLEP00000003825;ENSNLEP00000003824;	808	673	697	1366.14	1784	2138	2517	0.40092	-1.31861	5.12773e-100	3.37555e-98	down	yes
ENSG00000138193	Homo_sapiens	ENSG00000149948	HMGI/HMGY	ENSP00000437621;ENSP00000437747;ENSP00000443372;ENSP00000407306;ENSP00000439317;ENSP00000377206;ENSP00000346658;ENSP00000440919;ENSP00000384026;ENSP00000377205;	299	201	218	448.654	539	733	860	0.400775	-1.31914	5.57103e-33	1.08321e-31	down	yes
ENSG00000183647	Homo_sapiens	ENSG00000183647	zf-C2H2	ENSP00000332861;ENSP00000472564;	84	82	74	150.707	183	247	285	0.400023	-1.32185	1.41848e-15	1.35176e-14	down	yes
ENSG00000049541	Nomascus_leucogenys	ENSNLEG00000008912	zf-C2H2	ENSNLEP00000010858;	738	758	676	1365.4	1715	2124	2636	0.39987	-1.3224	7.29315e-109	5.34868e-107	down	yes
ENSG00000137812	Nomascus_leucogenys	ENSNLEG00000008912	zf-C2H2	ENSNLEP00000010858;	790	708	691	1376.91	1861	2096	2521	0.399759	-1.3228	5.40097e-98	3.44947e-96	down	yes
ENSG00000178966	Homo_sapiens	ENSG00000273150	GTF2I	ENSP00000477170;	246	215	205	419.369	530	678	777	0.398426	-1.32762	3.49971e-39	8.0074e-38	down	yes
ENSG00000079616	Tetraodon_nigroviridis	ENSTNIG00000005314	ZBTB	ENSTNIP00000021352;ENSTNIP00000007996;	825	775	789	1508.7	1839	2353	3004	0.397189	-1.3321	6.90513e-114	5.41407e-112	down	yes
ENSG00000156970	Nomascus_leucogenys	ENSNLEG00000003169	HMGI/HMGY	ENSNLEP00000003825;ENSNLEP00000003824;	906	832	759	1578.28	1910	2524	3099	0.395784	-1.33722	9.22954e-121	8.01889e-119	down	yes
ENSG00000140525	Pongo_abelii	ENSPPYG00000004736	HMGI/HMGY	ENSPPYP00000005395;ENSPPYP00000005394;	836	839	828	1588.79	1951	2576	3037	0.394952	-1.34025	6.73912e-117	5.48456e-115	down	yes
ENSG00000005961	Pan_troglodytes	ENSPTRG00000005184	HMGI/HMGY	ENSPTRP00000051717;	11	14	7	20.295	27	32	37	0.394143	-1.34321	0.00305001	0.00910095	down	yes
ENSG00000214776	Homo_sapiens	ENSG00000149948	HMGI/HMGY	ENSP00000437621;ENSP00000437747;ENSP00000443372;ENSP00000407306;ENSP00000439317;ENSP00000377206;ENSP00000346658;ENSP00000440919;ENSP00000384026;ENSP00000377205;	16	16	15	30.0131	47	36	58	0.39313	-1.34692	0.000375886	0.001317	down	yes
ENSG00000091651	Nomascus_leucogenys	ENSNLEG00000003169	HMGI/HMGY	ENSNLEP00000003825;ENSNLEP00000003824;	337	330	287	607.915	821	915	1145	0.392483	-1.3493	1.64913e-53	5.11388e-52	down	yes
ENSG00000168393	Pan_troglodytes	ENSPTRG00000015277	Homeobox	ENSPTRP00000026332;	1034	1094	895	1926.21	2501	2898	3779	0.392182	-1.35041	7.70522e-118	6.46167e-116	down	yes
ENSG00000101945	Latimeria_chalumnae	ENSLACG00000011159	MBD	ENSLACP00000012666;	114	96	82	185.413	219	314	354	0.392146	-1.35054	2.10978e-18	2.32534e-17	down	yes
ENSG00000145604	Pan_troglodytes	ENSPTRG00000005184	HMGI/HMGY	ENSPTRP00000051717;	625	569	533	1103	1440	1749	2050	0.390986	-1.35481	1.41441e-95	8.7721e-94	down	yes
ENSG00000197587	Homo_sapiens	ENSG00000197587	Homeobox	ENSP00000361024;ENSP00000353132;	9	8	12	18.6486	23	26	41	0.388634	-1.36352	0.00393453	0.0114412	down	yes
ENSG00000167325	Homo_sapiens	ENSG00000162924	RHD	ENSP00000295025;ENSP00000377989;	1332	1266	1183	2428.52	3000	3855	4793	0.387572	-1.36746	3.28701e-187	5.28332e-185	down	yes
ENSG00000100626	Nomascus_leucogenys	ENSNLEG00000008912	zf-C2H2	ENSNLEP00000010858;	37	47	38	78.6836	99	132	144	0.387027	-1.3695	3.94524e-09	2.40958e-08	down	yes
ENSG00000078900	Homo_sapiens	ENSG00000078900	P53	ENSP00000367545;ENSP00000367537;ENSP00000474626;ENSP00000346423;ENSP00000340740;ENSP00000350366;ENSP00000367529;ENSP00000367534;ENSP00000367539;ENSP00000474322;ENSP00000475143;	52	47	52	97.6056	145	135	181	0.386586	-1.37114	1.38223e-10	9.65958e-10	down	yes
ENSG00000267500	Gorilla_gorilla	ENSGGOG00000014654	zf-C2H2	ENSGGOP00000014294;	8	15	5	18.0335	23	30	33	0.386125	-1.37286	0.00559237	0.0157468	down	yes
ENSG00000123080	Homo_sapiens	ENSG00000104064	Others	--	416	443	388	805.022	1031	1235	1593	0.385459	-1.37535	1.54393e-71	6.58833e-70	down	yes
ENSG00000142945	Tetraodon_nigroviridis	ENSTNIG00000005314	ZBTB	ENSTNIP00000021352;ENSTNIP00000007996;	1053	933	893	1860.74	2249	3072	3633	0.383791	-1.38161	9.07542e-137	8.97675e-135	down	yes
ENSG00000163545	Homo_sapiens	ENSG00000149948	HMGI/HMGY	ENSP00000437621;ENSP00000437747;ENSP00000443372;ENSP00000407306;ENSP00000439317;ENSP00000377206;ENSP00000346658;ENSP00000440919;ENSP00000384026;ENSP00000377205;	49	66	40	100.471	131	157	193	0.38313	-1.38409	7.6443e-11	5.46086e-10	down	yes
ENSG00000163808	Tetraodon_nigroviridis	ENSTNIG00000005314	ZBTB	ENSTNIP00000021352;ENSTNIP00000007996;	423	424	372	789.989	989	1281	1522	0.382974	-1.38468	3.49602e-74	1.55014e-72	down	yes
ENSG00000062822	Homo_sapiens	ENSG00000142539	ETS	ENSP00000473233;	1062	1120	970	2046.43	2607	3205	4018	0.382351	-1.38703	1.39718e-150	1.6137e-148	down	yes
ENSG00000180096	Nomascus_leucogenys	ENSNLEG00000003169	HMGI/HMGY	ENSNLEP00000003825;ENSNLEP00000003824;	8	6	6	13.0134	19	18	25	0.380853	-1.39269	0.0130138	0.0337449	down	yes
ENSG00000213967	Nomascus_leucogenys	ENSNLEG00000026775	zf-C2H2	ENSNLEP00000023847;	7	6	7	12.9471	9	20	37	0.378425	-1.40192	0.0176124	0.0440256	down	yes
ENSG00000198901	Pan_troglodytes	ENSPTRG00000005184	HMGI/HMGY	ENSPTRP00000051717;	8	7	8	15.0997	19	28	25	0.377775	-1.4044	0.00725657	0.0199266	down	yes
ENSG00000166803	Homo_sapiens	ENSG00000149948	HMGI/HMGY	ENSP00000437621;ENSP00000437747;ENSP00000443372;ENSP00000407306;ENSP00000439317;ENSP00000377206;ENSP00000346658;ENSP00000440919;ENSP00000384026;ENSP00000377205;	248	222	174	419.564	481	657	913	0.377609	-1.40504	1.14001e-33	2.24832e-32	down	yes
ENSG00000175322	Nomascus_leucogenys	ENSNLEG00000008912	zf-C2H2	ENSNLEP00000010858;	43	33	45	79.691	120	118	139	0.377302	-1.40621	4.04828e-09	2.46786e-08	down	yes
ENSG00000139734	Nomascus_leucogenys	ENSNLEG00000003169	HMGI/HMGY	ENSNLEP00000003825;ENSNLEP00000003824;	502	470	438	930.904	1256	1459	1757	0.373766	-1.41979	2.80951e-88	1.57072e-86	down	yes
ENSG00000163009	Nomascus_leucogenys	ENSNLEG00000003169	HMGI/HMGY	ENSNLEP00000003825;ENSNLEP00000003824;	48	31	33	73.806	94	116	148	0.372127	-1.42613	3.47518e-09	2.13401e-08	down	yes
ENSG00000131351	Homo_sapiens	ENSG00000149948	HMGI/HMGY	ENSP00000437621;ENSP00000437747;ENSP00000443372;ENSP00000407306;ENSP00000439317;ENSP00000377206;ENSP00000346658;ENSP00000440919;ENSP00000384026;ENSP00000377205;	199	239	188	415.165	545	648	812	0.371805	-1.42738	9.46725e-40	2.20537e-38	down	yes
ENSG00000166801	Homo_sapiens	ENSG00000149948	HMGI/HMGY	ENSP00000437621;ENSP00000437747;ENSP00000443372;ENSP00000407306;ENSP00000439317;ENSP00000377206;ENSP00000346658;ENSP00000440919;ENSP00000384026;ENSP00000377205;	451	424	373	826.642	1040	1329	1641	0.371053	-1.4303	3.02789e-82	1.53286e-80	down	yes
ENSG00000167680	Nomascus_leucogenys	ENSNLEG00000003169	HMGI/HMGY	ENSNLEP00000003825;ENSNLEP00000003824;	751	832	725	1537.48	2008	2319	3136	0.369459	-1.43651	1.27757e-107	9.19468e-106	down	yes
ENSG00000164109	Homo_sapiens	ENSG00000149948	HMGI/HMGY	ENSP00000437621;ENSP00000437747;ENSP00000443372;ENSP00000407306;ENSP00000439317;ENSP00000377206;ENSP00000346658;ENSP00000440919;ENSP00000384026;ENSP00000377205;	667	625	616	1271.64	1694	1990	2460	0.369075	-1.43801	1.6242e-121	1.41754e-119	down	yes
ENSG00000167513	Nomascus_leucogenys	ENSNLEG00000003169	HMGI/HMGY	ENSNLEP00000003825;ENSNLEP00000003824;	402	437	375	809.711	1002	1289	1656	0.368188	-1.44149	8.36605e-74	3.66737e-72	down	yes
ENSG00000117650	Nomascus_leucogenys	ENSNLEG00000003169	HMGI/HMGY	ENSNLEP00000003825;ENSNLEP00000003824;	461	405	416	855.596	1123	1353	1667	0.368053	-1.44201	3.66895e-87	2.01614e-85	down	yes
ENSG00000156509	Nomascus_leucogenys	ENSNLEG00000008912	zf-C2H2	ENSNLEP00000010858;	88	80	65	155.733	198	251	309	0.365918	-1.45041	1.79514e-18	1.98763e-17	down	yes
ENSG00000138160	Tetraodon_nigroviridis	ENSTNIG00000005314	ZBTB	ENSTNIP00000021352;ENSTNIP00000007996;	1164	1082	1099	2248.76	3000	3594	4292	0.364897	-1.45444	1.78303e-187	2.89001e-185	down	yes
ENSG00000273891	Nomascus_leucogenys	ENSNLEG00000008912	zf-C2H2	ENSNLEP00000010858;	10	2	9	14.0758	13	32	24	0.363666	-1.45931	0.013173	0.0341323	down	yes
ENSG00000123219	Pan_troglodytes	ENSPTRG00000015277	Homeobox	ENSPTRP00000026332;	225	246	220	466.081	617	758	883	0.363626	-1.45947	6.14872e-49	1.74151e-47	down	yes
ENSG00000176884	Caenorhabditis_elegans	WBGene00003774	zf-LITAF-like	F07F6.6.1;F07F6.6.2;	4	8	12	16.4328	21	26	33	0.361683	-1.4672	0.00491205	0.0139946	down	yes
ENSG00000080986	Nomascus_leucogenys	ENSNLEG00000003169	HMGI/HMGY	ENSNLEP00000003825;ENSNLEP00000003824;	386	399	358	773.066	1004	1242	1519	0.361605	-1.46751	3.10223e-81	1.53033e-79	down	yes
ENSG00000156802	Anolis_carolinensis	ENSACAG00000003200	AF-4	ENSACAP00000003167;	1574	1408	1383	2958.51	3828	4913	5661	0.360196	-1.47315	1.28066e-236	2.87226e-234	down	yes
ENSG00000272870	Pan_troglodytes	ENSPTRG00000005184	HMGI/HMGY	ENSPTRP00000051717;	23	16	13	35.0772	43	64	64	0.359821	-1.47465	2.66259e-05	0.000110064	down	yes
ENSG00000205683	Homo_sapiens	ENSG00000133884	Others	--	46	23	46	78.4021	126	107	142	0.359247	-1.47695	2.25313e-08	1.29225e-07	down	yes
ENSG00000135476	Pan_troglodytes	ENSPTRG00000005184	HMGI/HMGY	ENSPTRP00000051717;	992	894	913	1910.88	2478	3085	3782	0.35683	-1.48669	3.46608e-184	5.39143e-182	down	yes
ENSG00000228716	Nomascus_leucogenys	ENSNLEG00000003169	HMGI/HMGY	ENSNLEP00000003825;ENSNLEP00000003824;	414	384	379	804.839	1049	1335	1544	0.356233	-1.48911	1.06605e-86	5.82494e-85	down	yes
ENSG00000171848	Nomascus_leucogenys	ENSNLEG00000008912	zf-C2H2	ENSNLEP00000010858;	804	802	723	1591.94	2014	2538	3271	0.355911	-1.49041	5.03285e-147	5.54707e-145	down	yes
ENSG00000185347	Pongo_abelii	ENSPPYG00000004736	HMGI/HMGY	ENSPPYP00000005395;ENSPPYP00000005394;	202	213	144	380.896	467	598	817	0.355891	-1.49049	3.29784e-35	6.7597e-34	down	yes
ENSG00000198056	Homo_sapiens	ENSG00000167562	zf-C2H2	ENSP00000301093;ENSP00000375662;ENSP00000444339;	144	114	98	243.638	330	387	473	0.354233	-1.49723	8.58376e-28	1.42115e-26	down	yes
ENSG00000075218	Nomascus_leucogenys	ENSNLEG00000003169	HMGI/HMGY	ENSNLEP00000003825;ENSNLEP00000003824;	680	631	614	1323.3	1802	2053	2611	0.353722	-1.49931	1.63308e-130	1.55167e-128	down	yes
ENSG00000111445	Nomascus_leucogenys	ENSNLEG00000018101	ARID	ENSNLEP00000021988;	366	370	347	745.854	972	1215	1468	0.352935	-1.50252	8.60057e-83	4.38856e-81	down	yes
ENSG00000004777	Dasypus_novemcinctus	ENSDNOG00000005811	bHLH	ENSDNOP00000028008;ENSDNOP00000004495;	89	92	79	179.774	243	299	335	0.351277	-1.50932	2.70573e-22	3.57208e-21	down	yes
ENSG00000149636	Nomascus_leucogenys	ENSNLEG00000008912	zf-C2H2	ENSNLEP00000010858;	308	311	343	667.896	835	1147	1303	0.349907	-1.51496	5.1818e-63	1.89652e-61	down	yes
ENSG00000185697	Homo_sapiens	ENSG00000185697	MYB	ENSP00000429633;ENSP00000428265;ENSP00000428011;	610	566	544	1194.17	1650	1924	2258	0.349201	-1.51787	8.04374e-118	6.71635e-116	down	yes
ENSG00000111206	Homo_sapiens	ENSG00000111206	Fork head	ENSP00000342307;ENSP00000354492;ENSP00000442309;ENSP00000352901;	795	776	714	1587.27	2069	2551	3198	0.348424	-1.52109	9.84097e-166	1.30009e-163	down	yes
ENSG00000159259	Gorilla_gorilla	ENSGGOG00000022966	HMGI/HMGY	ENSGGOP00000023432;	260	223	182	460.699	573	791	910	0.348048	-1.52264	6.43056e-48	1.79238e-46	down	yes
ENSG00000170577	Gorilla_gorilla	ENSGGOG00000008605	Homeobox	ENSGGOP00000008411;	53	75	55	127.834	179	187	262	0.347185	-1.52622	3.0147e-15	2.83785e-14	down	yes
ENSG00000119969	Cavia_porcellus	ENSCPOG00000013601	MYB	ENSCPOP00000012245;	461	406	371	864.165	1203	1379	1650	0.346073	-1.53085	4.88766e-89	2.78092e-87	down	yes
ENSG00000129810	Homo_sapiens	ENSG00000149948	HMGI/HMGY	ENSP00000437621;ENSP00000437747;ENSP00000443372;ENSP00000407306;ENSP00000439317;ENSP00000377206;ENSP00000346658;ENSP00000440919;ENSP00000384026;ENSP00000377205;	146	127	125	278.571	383	465	515	0.345322	-1.53399	1.3088e-33	2.57331e-32	down	yes
ENSG00000130675	Callithrix_jacchus	ENSCJAG00000004326	Homeobox	ENSCJAP00000007825;	45	63	77	130.4	157	199	296	0.344587	-1.53706	1.18068e-13	1.01304e-12	down	yes
ENSG00000251350	Gorilla_gorilla	ENSGGOG00000022966	HMGI/HMGY	ENSGGOP00000023432;	4	5	7	11.2326	10	21	26	0.34414	-1.53893	0.0135974	0.035114	down	yes
ENSG00000149403	Caenorhabditis_elegans	WBGene00003774	zf-LITAF-like	F07F6.6.1;F07F6.6.2;	9	8	8	17.4804	17	34	37	0.343237	-1.54272	0.00187899	0.0058483	down	yes
ENSG00000150893	Homo_sapiens	ENSG00000149948	HMGI/HMGY	ENSP00000437621;ENSP00000437747;ENSP00000443372;ENSP00000407306;ENSP00000439317;ENSP00000377206;ENSP00000346658;ENSP00000440919;ENSP00000384026;ENSP00000377205;	154	120	109	268.868	378	440	499	0.342884	-1.54421	4.61115e-31	8.47046e-30	down	yes
ENSG00000014138	Nomascus_leucogenys	ENSNLEG00000003169	HMGI/HMGY	ENSNLEP00000003825;ENSNLEP00000003824;	30	23	15	47.3837	56	75	107	0.342597	-1.54542	5.74462e-07	2.86978e-06	down	yes
ENSG00000100297	Pan_troglodytes	ENSPTRG00000001856	ARID	ENSPTRP00000003106;	979	919	909	1977.03	2510	3291	4000	0.342012	-1.54788	9.56894e-194	1.64791e-191	down	yes
ENSG00000237649	Tetraodon_nigroviridis	ENSTNIG00000005314	ZBTB	ENSTNIP00000021352;ENSTNIP00000007996;	872	801	812	1751.07	2277	2914	3464	0.341998	-1.54794	5.6326e-181	8.42183e-179	down	yes
ENSG00000102384	Pongo_abelii	ENSPPYG00000004736	HMGI/HMGY	ENSPPYP00000005395;ENSPPYP00000005394;	208	176	170	390.154	545	608	767	0.34198	-1.54802	2.23962e-46	5.9997e-45	down	yes
ENSG00000148483	Nomascus_leucogenys	ENSNLEG00000003169	HMGI/HMGY	ENSNLEP00000003825;ENSNLEP00000003824;	9	5	4	12.6454	17	19	27	0.338946	-1.56087	0.00728292	0.0199876	down	yes
ENSG00000231607	Nomascus_leucogenys	ENSNLEG00000003169	HMGI/HMGY	ENSNLEP00000003825;ENSNLEP00000003824;	77	90	83	177.588	240	255	389	0.33894	-1.5609	2.33578e-21	2.95233e-20	down	yes
ENSG00000094804	Homo_sapiens	ENSG00000149948	HMGI/HMGY	ENSP00000437621;ENSP00000437747;ENSP00000443372;ENSP00000407306;ENSP00000439317;ENSP00000377206;ENSP00000346658;ENSP00000440919;ENSP00000384026;ENSP00000377205;	762	739	702	1563.16	1965	2550	3280	0.338423	-1.5631	8.84474e-153	1.07294e-150	down	yes
ENSG00000144554	Homo_sapiens	ENSG00000160352	zf-C2H2	ENSP00000472368;ENSP00000468862;	240	209	190	454.471	597	724	941	0.336712	-1.57041	1.07948e-55	3.51706e-54	down	yes
ENSG00000112029	Nomascus_leucogenys	ENSNLEG00000003169	HMGI/HMGY	ENSNLEP00000003825;ENSNLEP00000003824;	378	388	341	789.885	1057	1307	1547	0.336447	-1.57155	3.77301e-92	2.2255e-90	down	yes
ENSG00000177084	Pongo_abelii	ENSPPYG00000004736	HMGI/HMGY	ENSPPYP00000005395;ENSPPYP00000005394;	1025	973	836	2022.51	2632	3495	3901	0.335624	-1.57508	3.57544e-171	5.0338e-169	down	yes
ENSG00000138658	Pongo_abelii	ENSPPYG00000008158	Homeobox	ENSPPYP00000009170;	73	75	64	152.041	209	228	320	0.333821	-1.58285	1.8048e-20	2.20323e-19	down	yes
ENSG00000140451	Nomascus_leucogenys	ENSNLEG00000008912	zf-C2H2	ENSNLEP00000010858;	302	292	260	612.985	806	988	1263	0.333148	-1.58576	6.41831e-76	2.96874e-74	down	yes
ENSG00000137804	Homo_sapiens	ENSG00000149948	HMGI/HMGY	ENSP00000437621;ENSP00000437747;ENSP00000443372;ENSP00000407306;ENSP00000439317;ENSP00000377206;ENSP00000346658;ENSP00000440919;ENSP00000384026;ENSP00000377205;	36	27	29	66.0046	82	119	128	0.332779	-1.58737	6.16191e-10	4.07862e-09	down	yes
ENSG00000160949	Nomascus_leucogenys	ENSNLEG00000008912	zf-C2H2	ENSNLEP00000010858;	615	484	523	1166.89	1561	1978	2252	0.332231	-1.58974	8.26564e-115	6.56081e-113	down	yes
ENSG00000071282	Oreochromis_niloticus	ENSONIG00000011305	Homeobox	ENSONIP00000014230;	92	65	78	169.257	231	292	314	0.332013	-1.59069	7.64239e-22	9.913e-21	down	yes
ENSG00000137135	Pongo_abelii	ENSPPYG00000004736	HMGI/HMGY	ENSPPYP00000005395;ENSPPYP00000005394;	123	83	87	210.218	267	335	454	0.331547	-1.59271	9.69843e-26	1.47294e-24	down	yes
ENSG00000184445	Homo_sapiens	ENSG00000273150	GTF2I	ENSP00000477170;	760	699	633	1509.58	2095	2508	2870	0.331172	-1.59435	3.3378e-149	3.78703e-147	down	yes
ENSG00000112984	Tetraodon_nigroviridis	ENSTNIG00000005314	ZBTB	ENSTNIP00000021352;ENSTNIP00000007996;	1223	1244	1123	2594.83	3431	4214	5308	0.330548	-1.59707	4.97132e-251	1.29577e-248	down	yes
ENSG00000075702	Nomascus_leucogenys	ENSNLEG00000008912	zf-C2H2	ENSNLEP00000010858;	520	418	452	1009.88	1345	1671	2027	0.327895	-1.60869	4.46113e-114	3.51209e-112	down	yes
ENSG00000143375	Homo_sapiens	ENSG00000186103	Homeobox	ENSP00000335578;	92	84	81	187.66	259	271	413	0.325636	-1.61867	1.53456e-24	2.21215e-23	down	yes
ENSG00000109674	Nomascus_leucogenys	ENSNLEG00000003169	HMGI/HMGY	ENSNLEP00000003825;ENSNLEP00000003824;	169	138	94	291.855	396	488	574	0.325102	-1.62104	5.49226e-32	1.03858e-30	down	yes
ENSG00000104738	Pan_troglodytes	ENSPTRG00000011420	zf-C2H2	ENSPTRP00000019625;	1676	1582	1454	3462.58	4574	5742	7066	0.323015	-1.63033	0	0	down	yes
ENSG00000196584	Nomascus_leucogenys	ENSNLEG00000003169	HMGI/HMGY	ENSNLEP00000003825;ENSNLEP00000003824;	243	190	192	461.299	645	758	902	0.32103	-1.63922	4.77356e-58	1.60685e-56	down	yes
ENSG00000071539	Nomascus_leucogenys	ENSNLEG00000003169	HMGI/HMGY	ENSNLEP00000003825;ENSNLEP00000003824;	424	419	410	930.921	1215	1561	1917	0.318784	-1.64935	1.52527e-116	1.23611e-114	down	yes
ENSG00000187741	Gorilla_gorilla	ENSGGOG00000010960	zf-C2H2	ENSGGOP00000010684;	354	341	319	762.38	1061	1269	1501	0.314039	-1.67099	8.55028e-100	5.60945e-98	down	yes
ENSG00000105855	Nomascus_leucogenys	ENSNLEG00000003169	HMGI/HMGY	ENSNLEP00000003825;ENSNLEP00000003824;	7	2	6	11.3699	17	18	22	0.310276	-1.68838	0.00714532	0.0196547	down	yes
ENSG00000092470	Pongo_abelii	ENSPPYG00000004736	HMGI/HMGY	ENSPPYP00000005395;ENSPPYP00000005394;	250	211	199	500.763	690	830	1012	0.309493	-1.69202	1.79662e-69	7.32624e-68	down	yes
ENSG00000198554	Homo_sapiens	ENSG00000198554	HMG	ENSP00000353793;ENSP00000399349;ENSP00000352085;ENSP00000391049;	719	649	613	1523.27	2119	2533	3072	0.304505	-1.71546	1.16366e-193	1.98626e-191	down	yes
ENSG00000154080	Nomascus_leucogenys	ENSNLEG00000008912	zf-C2H2	ENSNLEP00000010858;	6	3	8	13.1868	17	20	31	0.301757	-1.72854	0.00309795	0.0092226	down	yes
ENSG00000136492	Nomascus_leucogenys	ENSNLEG00000003169	HMGI/HMGY	ENSNLEP00000003825;ENSNLEP00000003824;	243	238	213	537.754	759	868	1107	0.301672	-1.72895	1.76225e-76	8.19042e-75	down	yes
ENSG00000178999	Nomascus_leucogenys	ENSNLEG00000000122	zf-C2H2	ENSNLEP00000000137;	575	540	462	1229.71	1661	1975	2675	0.298351	-1.74492	1.55332e-144	1.67376e-142	down	yes
ENSG00000147234	Pan_troglodytes	ENSPTRG00000005184	HMGI/HMGY	ENSPTRP00000051717;	17	15	13	35.071	48	55	77	0.29831	-1.74511	7.54494e-07	3.72477e-06	down	yes
ENSG00000165490	Tetraodon_nigroviridis	ENSTNIG00000004657	ZBTB	ENSTNIP00000007310;	355	291	273	717.076	957	1212	1506	0.297876	-1.74722	4.46865e-98	2.8635e-96	down	yes
ENSG00000241472	Nomascus_leucogenys	ENSNLEG00000008912	zf-C2H2	ENSNLEP00000010858;	17	30	30	60.963	91	100	117	0.296858	-1.75216	6.50114e-10	4.28991e-09	down	yes
ENSG00000085840	Nomascus_leucogenys	ENSNLEG00000008912	zf-C2H2	ENSNLEP00000010858;	172	218	161	434.793	600	749	871	0.295052	-1.76096	6.33849e-56	2.07215e-54	down	yes
ENSG00000177822	Homo_sapiens	ENSG00000149948	HMGI/HMGY	ENSP00000437621;ENSP00000437747;ENSP00000443372;ENSP00000407306;ENSP00000439317;ENSP00000377206;ENSP00000346658;ENSP00000440919;ENSP00000384026;ENSP00000377205;	2	6	2	7.91928	11	11	19	0.293582	-1.76817	0.0198983	0.0489602	down	yes
ENSG00000137310	Homo_sapiens	ENSG00000137310	Others	--	461	427	421	1038.15	1444	1717	2162	0.292698	-1.77252	1.57619e-148	1.77786e-146	down	yes
ENSG00000226674	Nomascus_leucogenys	ENSNLEG00000003169	HMGI/HMGY	ENSNLEP00000003825;ENSNLEP00000003824;	9	10	9	22.1773	26	37	53	0.292037	-1.77578	7.10102e-05	0.000275694	down	yes
ENSG00000204131	Homo_sapiens	ENSG00000149948	HMGI/HMGY	ENSP00000437621;ENSP00000437747;ENSP00000443372;ENSP00000407306;ENSP00000439317;ENSP00000377206;ENSP00000346658;ENSP00000440919;ENSP00000384026;ENSP00000377205;	8	3	7	14.3528	26	18	28	0.291835	-1.77678	0.00194178	0.00602914	down	yes
ENSG00000089685	Pan_troglodytes	ENSPTRG00000029808	Homeobox	ENSPTRP00000050483;	1023	1016	903	2344.98	3025	4019	5093	0.290349	-1.78414	9.75644e-240	2.2949e-237	down	yes
ENSG00000115687	Nomascus_leucogenys	ENSNLEG00000006043	zf-C2H2	ENSNLEP00000007313;	203	165	135	401.137	509	741	823	0.288856	-1.79158	2.14066e-52	6.49199e-51	down	yes
ENSG00000197299	Nomascus_leucogenys	ENSNLEG00000003169	HMGI/HMGY	ENSNLEP00000003825;ENSNLEP00000003824;	212	202	163	463.677	592	830	982	0.286668	-1.80255	3.10444e-66	1.19043e-64	down	yes
ENSG00000092853	Pongo_abelii	ENSPPYG00000004736	HMGI/HMGY	ENSPPYP00000005395;ENSPPYP00000005394;	351	365	361	870.71	1200	1513	1767	0.286138	-1.80522	7.04575e-122	6.20541e-120	down	yes
ENSG00000101412	Homo_sapiens	ENSG00000101412	E2F	ENSP00000345571;	580	526	566	1359.81	1903	2284	2830	0.283649	-1.81782	6.3557e-185	9.96657e-183	down	yes
ENSG00000186185	Homo_sapiens	ENSG00000149948	HMGI/HMGY	ENSP00000437621;ENSP00000437747;ENSP00000443372;ENSP00000407306;ENSP00000439317;ENSP00000377206;ENSP00000346658;ENSP00000440919;ENSP00000384026;ENSP00000377205;	970	980	927	2339.23	3204	4002	4884	0.283627	-1.81793	1.75156e-298	6.03289e-296	down	yes
ENSG00000176208	Homo_sapiens	ENSG00000149948	HMGI/HMGY	ENSP00000437621;ENSP00000437747;ENSP00000443372;ENSP00000407306;ENSP00000439317;ENSP00000377206;ENSP00000346658;ENSP00000440919;ENSP00000384026;ENSP00000377205;	214	208	179	490.672	730	883	889	0.282315	-1.82462	4.82428e-62	1.73926e-60	down	yes
ENSG00000028137	Pongo_abelii	ENSPPYG00000004736	HMGI/HMGY	ENSPPYP00000005395;ENSPPYP00000005394;	3	4	4	8.94478	7	19	22	0.281889	-1.8268	0.0109376	0.0288473	down	yes
ENSG00000171241	Nomascus_leucogenys	ENSNLEG00000014454	zf-C2H2	ENSNLEP00000017586;ENSNLEP00000017579;	623	491	523	1337.44	1901	2242	2763	0.281341	-1.82961	2.93937e-170	4.1083e-168	down	yes
ENSG00000188910	Tetraodon_nigroviridis	ENSTNIG00000019151	HSF	ENSTNIP00000022348;	11	6	16	27.18	39	50	50	0.281287	-1.82988	1.42443e-05	6.10816e-05	down	yes
ENSG00000136943	Nomascus_leucogenys	ENSNLEG00000008912	zf-C2H2	ENSNLEP00000010858;	25	18	30	59.9455	92	82	136	0.281031	-1.8312	2.37551e-10	1.62536e-09	down	yes
ENSG00000147536	Nomascus_leucogenys	ENSNLEG00000003169	HMGI/HMGY	ENSNLEP00000003825;ENSNLEP00000003824;	136	131	116	313.262	427	521	680	0.280794	-1.83242	1.3901e-51	4.15694e-50	down	yes
ENSG00000257446	Homo_sapiens	ENSG00000257446	zf-C2H2	ENSP00000472036;ENSP00000447931;	2	5	2	7.42908	12	11	15	0.279868	-1.83718	0.0187425	0.0464301	down	yes
ENSG00000165244	Homo_sapiens	ENSG00000165244	zf-C2H2	ENSP00000364405;	313	293	300	750.573	1065	1205	1633	0.27685	-1.85283	8.91663e-110	6.6646e-108	down	yes
ENSG00000185585	Homo_sapiens	ENSG00000149948	HMGI/HMGY	ENSP00000437621;ENSP00000437747;ENSP00000443372;ENSP00000407306;ENSP00000439317;ENSP00000377206;ENSP00000346658;ENSP00000440919;ENSP00000384026;ENSP00000377205;	68	68	68	169.396	216	311	358	0.275803	-1.85829	5.24391e-29	8.94293e-28	down	yes
ENSG00000111665	Nomascus_leucogenys	ENSNLEG00000003169	HMGI/HMGY	ENSNLEP00000003825;ENSNLEP00000003824;	435	423	358	1011.85	1370	1704	2216	0.274531	-1.86496	2.51874e-146	2.76031e-144	down	yes
ENSG00000149571	Homo_sapiens	ENSG00000149948	HMGI/HMGY	ENSP00000437621;ENSP00000437747;ENSP00000443372;ENSP00000407306;ENSP00000439317;ENSP00000377206;ENSP00000346658;ENSP00000440919;ENSP00000384026;ENSP00000377205;	16	14	12	35.1163	58	53	69	0.274001	-1.86775	2.53022e-07	1.30769e-06	down	yes
ENSG00000197275	Cavia_porcellus	ENSCPOG00000013601	MYB	ENSCPOP00000012245;	25	10	17	43.38	71	65	87	0.273469	-1.87055	3.99245e-08	2.23856e-07	down	yes
ENSG00000133083	Nomascus_leucogenys	ENSNLEG00000003169	HMGI/HMGY	ENSNLEP00000003825;ENSNLEP00000003824;	41	50	45	114.804	166	191	240	0.271119	-1.883	7.24715e-21	8.96045e-20	down	yes
ENSG00000163040	Homo_sapiens	ENSG00000167562	zf-C2H2	ENSP00000301093;ENSP00000375662;ENSP00000444339;	32	20	23	63.547	101	120	103	0.269178	-1.89337	2.85091e-11	2.1004e-10	down	yes
ENSG00000169247	Nomascus_leucogenys	ENSNLEG00000008912	zf-C2H2	ENSNLEP00000010858;	138	98	119	301.329	436	513	621	0.268157	-1.89885	3.04101e-49	8.70251e-48	down	yes
ENSG00000128510	Homo_sapiens	ENSG00000149948	HMGI/HMGY	ENSP00000437621;ENSP00000437747;ENSP00000443372;ENSP00000407306;ENSP00000439317;ENSP00000377206;ENSP00000346658;ENSP00000440919;ENSP00000384026;ENSP00000377205;	4	6	10	17.5715	34	19	37	0.26199	-1.93242	0.000385927	0.00134997	down	yes
ENSG00000154556	Pan_troglodytes	ENSPTRG00000005184	HMGI/HMGY	ENSPTRP00000051717;	19	13	23	48.2093	62	83	112	0.257734	-1.95605	6.1223e-10	4.05379e-09	down	yes
ENSG00000186871	Cavia_porcellus	ENSCPOG00000013601	MYB	ENSCPOP00000012245;	259	238	271	675.168	949	1237	1361	0.257293	-1.95851	4.25102e-103	2.90758e-101	down	yes
ENSG00000265763	Homo_sapiens	ENSG00000265763	zf-C2H2	ENSP00000462269;ENSP00000468133;	48	61	59	148.957	216	248	322	0.255028	-1.97127	1.25868e-27	2.07145e-26	down	yes
ENSG00000126803	Homo_sapiens	ENSG00000149948	HMGI/HMGY	ENSP00000437621;ENSP00000437747;ENSP00000443372;ENSP00000407306;ENSP00000439317;ENSP00000377206;ENSP00000346658;ENSP00000440919;ENSP00000384026;ENSP00000377205;	124	131	105	318.608	481	544	646	0.254827	-1.97241	1.19333e-55	3.88146e-54	down	yes
ENSG00000171320	Pan_troglodytes	ENSPTRG00000010773	zf-C2H2	ENSPTRP00000058362;	92	112	92	267.185	404	461	542	0.249161	-2.00485	1.67327e-47	4.62379e-46	down	yes
ENSG00000256663	Otolemur_garnettii	ENSOGAG00000006574	HMG	ENSOGAP00000005885;	79	109	91	254.406	364	454	532	0.24615	-2.02239	6.9069e-45	1.8076e-43	down	yes
ENSG00000101057	Homo_sapiens	ENSG00000101057	MYB	ENSP00000217026;ENSP00000380072;	1129	1134	1122	3089.03	4301	5361	6845	0.245178	-2.0281	0	0	down	yes
ENSG00000146966	Nomascus_leucogenys	ENSNLEG00000003169	HMGI/HMGY	ENSNLEP00000003825;ENSNLEP00000003824;	3	7	10	18.4797	27	27	45	0.244453	-2.03237	9.54662e-05	0.000365493	down	yes
ENSG00000104889	Pan_troglodytes	ENSPTRG00000005184	HMGI/HMGY	ENSPTRP00000051717;	7	6	3	14.4708	15	30	34	0.244178	-2.034	0.000416812	0.00145143	down	yes
ENSG00000101003	Nomascus_leucogenys	ENSNLEG00000003169	HMGI/HMGY	ENSNLEP00000003825;ENSNLEP00000003824;	337	329	319	906.042	1307	1612	1903	0.242798	-2.04217	5.85194e-163	7.57532e-161	down	yes
ENSG00000196081	Homo_sapiens	ENSG00000196081	zf-C2H2	ENSP00000413411;	7	5	3	13.7953	22	23	28	0.241233	-2.0515	0.00044282	0.00153589	down	yes
ENSG00000276043	Homo_sapiens	ENSG00000149948	HMGI/HMGY	ENSP00000437621;ENSP00000437747;ENSP00000443372;ENSP00000407306;ENSP00000439317;ENSP00000377206;ENSP00000346658;ENSP00000440919;ENSP00000384026;ENSP00000377205;	1178	1151	1087	3167.14	4618	5466	6826	0.240298	-2.0571	0	0	down	yes
ENSG00000138347	Nomascus_leucogenys	ENSNLEG00000003169	HMGI/HMGY	ENSNLEP00000003825;ENSNLEP00000003824;	6	9	8	21.5853	28	47	40	0.237843	-2.07192	1.24981e-05	5.40014e-05	down	yes
ENSG00000221818	Oryctolagus_cuniculus	ENSOCUG00000011972	COE	ENSOCUP00000010295;	2	1	4	6.63911	10	13	12	0.236746	-2.07859	0.0144757	0.0370593	down	yes
ENSG00000133401	Nomascus_leucogenys	ENSNLEG00000003169	HMGI/HMGY	ENSNLEP00000003825;ENSNLEP00000003824;	20	20	11	47.9154	79	77	98	0.235877	-2.08389	9.86771e-11	6.98453e-10	down	yes
ENSG00000260167	Nomascus_leucogenys	ENSNLEG00000003169	HMGI/HMGY	ENSNLEP00000003825;ENSNLEP00000003824;	4	2	1	6.56368	12	12	10	0.235551	-2.08589	0.0151687	0.0386543	down	yes
ENSG00000061337	Homo_sapiens	ENSG00000273150	GTF2I	ENSP00000477170;	14	10	9	31.3666	51	60	54	0.233073	-2.10114	1.17677e-07	6.28567e-07	down	yes
ENSG00000132164	Homo_sapiens	ENSG00000149948	HMGI/HMGY	ENSP00000437621;ENSP00000437747;ENSP00000443372;ENSP00000407306;ENSP00000439317;ENSP00000377206;ENSP00000346658;ENSP00000440919;ENSP00000384026;ENSP00000377205;	3	4	0	6.71988	12	13	10	0.229026	-2.12642	0.0147326	0.0376223	down	yes
ENSG00000108984	Pongo_abelii	ENSPPYG00000004736	HMGI/HMGY	ENSPPYP00000005395;ENSPPYP00000005394;	27	20	20	64.9523	89	137	123	0.22687	-2.14006	2.16363e-14	1.94103e-13	down	yes
ENSG00000077063	Homo_sapiens	ENSG00000064490	Others	--	3	0	3	5.97518	11	12	8	0.221928	-2.17183	0.0195122	0.0481206	down	yes
ENSG00000161888	Nomascus_leucogenys	ENSNLEG00000003169	HMGI/HMGY	ENSNLEP00000003825;ENSNLEP00000003824;	129	137	143	407.341	591	730	891	0.22046	-2.18141	1.21801e-83	6.31532e-82	down	yes
ENSG00000247095	Homo_sapiens	ENSG00000149948	HMGI/HMGY	ENSP00000437621;ENSP00000437747;ENSP00000443372;ENSP00000407306;ENSP00000439317;ENSP00000377206;ENSP00000346658;ENSP00000440919;ENSP00000384026;ENSP00000377205;	11	14	7	31.8275	45	56	73	0.219461	-2.18797	2.55249e-08	1.45701e-07	down	yes
ENSG00000065328	Nomascus_leucogenys	ENSNLEG00000003169	HMGI/HMGY	ENSNLEP00000003825;ENSNLEP00000003824;	375	392	409	1183.55	1648	2193	2624	0.217544	-2.20062	3.05126e-199	5.60501e-197	down	yes
ENSG00000279968	Nomascus_leucogenys	ENSNLEG00000008912	zf-C2H2	ENSNLEP00000010858;	6	5	5	16.1334	23	30	35	0.216339	-2.20864	5.02941e-05	0.000199809	down	yes
ENSG00000085999	Cavia_porcellus	ENSCPOG00000013601	MYB	ENSCPOP00000012245;	135	126	114	381.735	552	723	805	0.214068	-2.22386	1.09393e-81	5.48046e-80	down	yes
ENSG00000274825	Nomascus_leucogenys	ENSNLEG00000008912	zf-C2H2	ENSNLEP00000010858;	2	3	2	7.18731	10	11	19	0.211423	-2.24179	0.00637079	0.0177265	down	yes
ENSG00000129173	Homo_sapiens	ENSG00000129173	E2F	ENSP00000434199;ENSP00000250024;	95	78	107	294.606	442	529	644	0.206334	-2.27694	1.44347e-62	5.23341e-61	down	yes
ENSG00000204531	Pan_troglodytes	ENSPTRG00000017953	Pou	ENSPTRP00000030631;	0	2	3	5.36204	8	11	10	0.206029	-2.27908	0.0199476	0.0490563	down	yes
ENSG00000100206	Nomascus_leucogenys	ENSNLEG00000003169	HMGI/HMGY	ENSNLEP00000003825;ENSNLEP00000003824;	3	0	5	8.46587	9	12	28	0.203785	-2.29488	0.00469167	0.0134422	down	yes
ENSG00000118513	Pongo_abelii	ENSPPYG00000017028	MYB	ENSPPYP00000019068;	12	10	13	41.4747	72	69	89	0.179472	-2.47817	5.01714e-12	3.87702e-11	down	yes
ENSG00000108387	Pan_troglodytes	ENSPTRG00000005184	HMGI/HMGY	ENSPTRP00000051717;	3	3	6	14.3792	25	27	27	0.178603	-2.48517	4.6788e-05	0.000186688	down	yes
ENSG00000082126	Nomascus_leucogenys	ENSNLEG00000003169	HMGI/HMGY	ENSNLEP00000003825;ENSNLEP00000003824;	76	91	54	265.062	380	499	625	0.175542	-2.51011	9.94115e-63	3.61783e-61	down	yes
ENSG00000266456	Nomascus_leucogenys	ENSNLEG00000003169	HMGI/HMGY	ENSNLEP00000003825;ENSNLEP00000003824;	2	0	3	6.14767	9	11	15	0.171566	-2.54316	0.00687381	0.0189674	down	yes
ENSG00000247151	Nomascus_leucogenys	ENSNLEG00000003169	HMGI/HMGY	ENSNLEP00000003825;ENSNLEP00000003824;	1	2	3	7.65386	7	18	20	0.16412	-2.60718	0.00224744	0.00688182	down	yes
ENSG00000131153	Pan_troglodytes	ENSPTRG00000005184	HMGI/HMGY	ENSPTRP00000051717;	133	86	103	416.646	586	802	1015	0.160449	-2.63981	2.78713e-99	1.81616e-97	down	yes
ENSG00000007968	Homo_sapiens	ENSG00000007968	E2F	ENSP00000355249;	69	59	61	256.836	384	469	635	0.151959	-2.71824	4.25872e-73	1.83763e-71	down	yes
ENSG00000113494	Nomascus_leucogenys	ENSNLEG00000008912	zf-C2H2	ENSNLEP00000010858;	12	10	7	41.0312	56	86	98	0.144473	-2.79113	1.13854e-13	9.78616e-13	down	yes
ENSG00000145861	Homo_sapiens	ENSG00000149948	HMGI/HMGY	ENSP00000437621;ENSP00000437747;ENSP00000443372;ENSP00000407306;ENSP00000439317;ENSP00000377206;ENSP00000346658;ENSP00000440919;ENSP00000384026;ENSP00000377205;	9	2	4	22.1105	25	47	61	0.136551	-2.87249	8.01836e-08	4.36025e-07	down	yes
ENSG00000259349	Homo_sapiens	ENSG00000149948	HMGI/HMGY	ENSP00000437621;ENSP00000437747;ENSP00000443372;ENSP00000407306;ENSP00000439317;ENSP00000377206;ENSP00000346658;ENSP00000440919;ENSP00000384026;ENSP00000377205;	0	2	1	5.1145	9	9	12	0.119097	-3.06979	0.0058303	0.0163499	down	yes
ENSG00000232600	Pongo_abelii	ENSPPYG00000004736	HMGI/HMGY	ENSPPYP00000005395;ENSPPYP00000005394;	2	0	2	7.93624	9	15	26	0.0985022	-3.3437	0.000412117	0.0014356	down	yes
ENSG00000277531	Nomascus_leucogenys	ENSNLEG00000003169	HMGI/HMGY	ENSNLEP00000003825;ENSNLEP00000003824;	0	1	1	4.93335	9	9	12	0.0793729	-3.65521	0.00377209	0.011012	down	yes
ENSG00000139973	Nomascus_leucogenys	ENSNLEG00000003169	HMGI/HMGY	ENSNLEP00000003825;ENSNLEP00000003824;	0	0	2	4.97812	10	8	12	0.0792923	-3.65668	0.00409609	0.0118502	down	yes
ENSG00000275632	Nomascus_leucogenys	ENSNLEG00000008912	zf-C2H2	ENSNLEP00000010858;	1	0	0	2.74478	5	5	7	0.0750824	-3.73538	0.0159404	0.0404284	down	yes
ENSG00000077274	Homo_sapiens	ENSG00000103326	Others	--	2	0	1	7.9581	22	15	8	0.0732779	-3.77048	0.000418851	0.00145827	down	yes
ENSG00000263080	Nomascus_leucogenys	ENSNLEG00000008912	zf-C2H2	ENSNLEP00000010858;	1	1	0	6.3844	16	10	12	0.0599103	-4.06105	0.000949089	0.0031223	down	yes
ENSG00000179869	Pongo_abelii	ENSPPYG00000004736	HMGI/HMGY	ENSPPYP00000005395;ENSPPYP00000005394;	0	0	1	3.45598	8	5	8	0.0595703	-4.06926	0.00631037	0.0175749	down	yes
ENSG00000251169	Homo_sapiens	ENSG00000273150	GTF2I	ENSP00000477170;	2	0	0	6.43284	10	17	13	0.0584008	-4.09787	0.000853953	0.00282765	down	yes
